# Supplementary material for: Quinoline-triazole half-sandwich iridium(iii) complexes: synthesis, antiplasmodial activity and preliminary transfer hydrogenation studies
Source: Royal Society of Chemistry journal article supplement (doi:10.1039/d0dt01935f), 2020-01-01
Supplement: d0dt01935f1.pdf [file d0dt01935f1.pdf]

## Supplementary Information

### Quinoline-triazole half-sandwich iridium(III) complexes: Synthesis, antiplasmodial activity and preliminary transfer hydrogenation studies

Diana R. Melis <sup>a</sup>, Chris Barnett <sup>a</sup>, Lubbe Wiesner <sup>b</sup>, Ebbe Nordlander <sup>c</sup> and  
Gregory S. Smith\*<sup>a</sup>

<sup>a</sup> Department of Chemistry, University of Cape Town, Rondebosch, Cape Town, South Africa.

E-mail: [gregory.smith@uct.ac.za](mailto:gregory.smith@uct.ac.za)

<sup>b</sup> Division of Clinical Pharmacology, Department of Medicine, University of Cape Town,  
Observatory 7925, Cape Town, South Africa.

<sup>c</sup> Chemical Physics, Department of Chemistry, Lund University, Box 124, SE-221 00 Lund,  
Sweden.

|                            |                                                                                                               | Page |
|----------------------------|---------------------------------------------------------------------------------------------------------------|------|
| Figures <b>S1 – S14</b> :  | <sup>1</sup> H and <sup>13</sup> C{ <sup>1</sup> H} NMR spectra of <b>2a-2g</b> , <b>3a-3f</b> and <b>4</b> . | 2    |
| Figures <b>S15 – S20</b> : | Purity by LCMS of <b>2a-f</b> .                                                                               | 16   |
| Figures <b>S21 – S27</b> : | ESI- Mass Spectra of <b>2g</b> and <b>3a-f</b> .                                                              | 19   |
| <b>Table S1</b> :          | Crystallographic data and refinement parameters for<br>complexes <b>3a</b> and <b>4</b> .                     | 23   |
| <b>Table S2</b> :          | Selected bond lengths and angles for iridium(III)<br>complexes <b>3a</b> and <b>4</b> .                       | 23   |

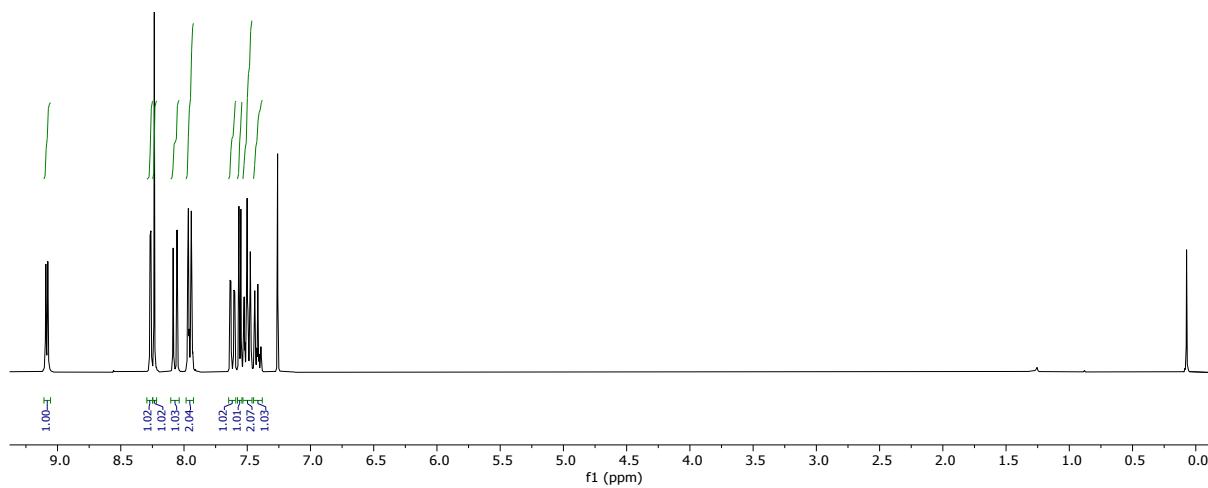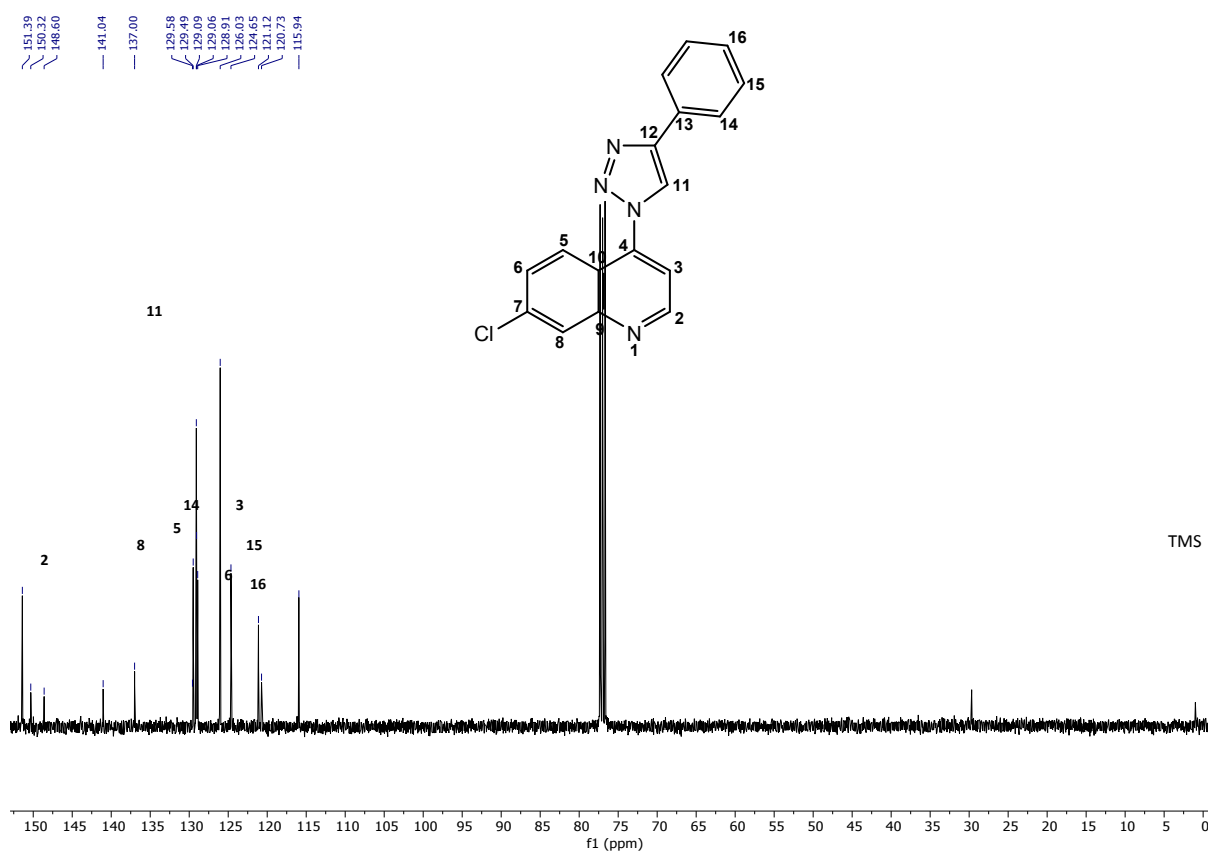

Figure S1:  $^1\text{H}$  and  $^{13}\text{C}\{^1\text{H}\}$  NMR spectra of **2a** in  $\text{CDCl}_3$ .

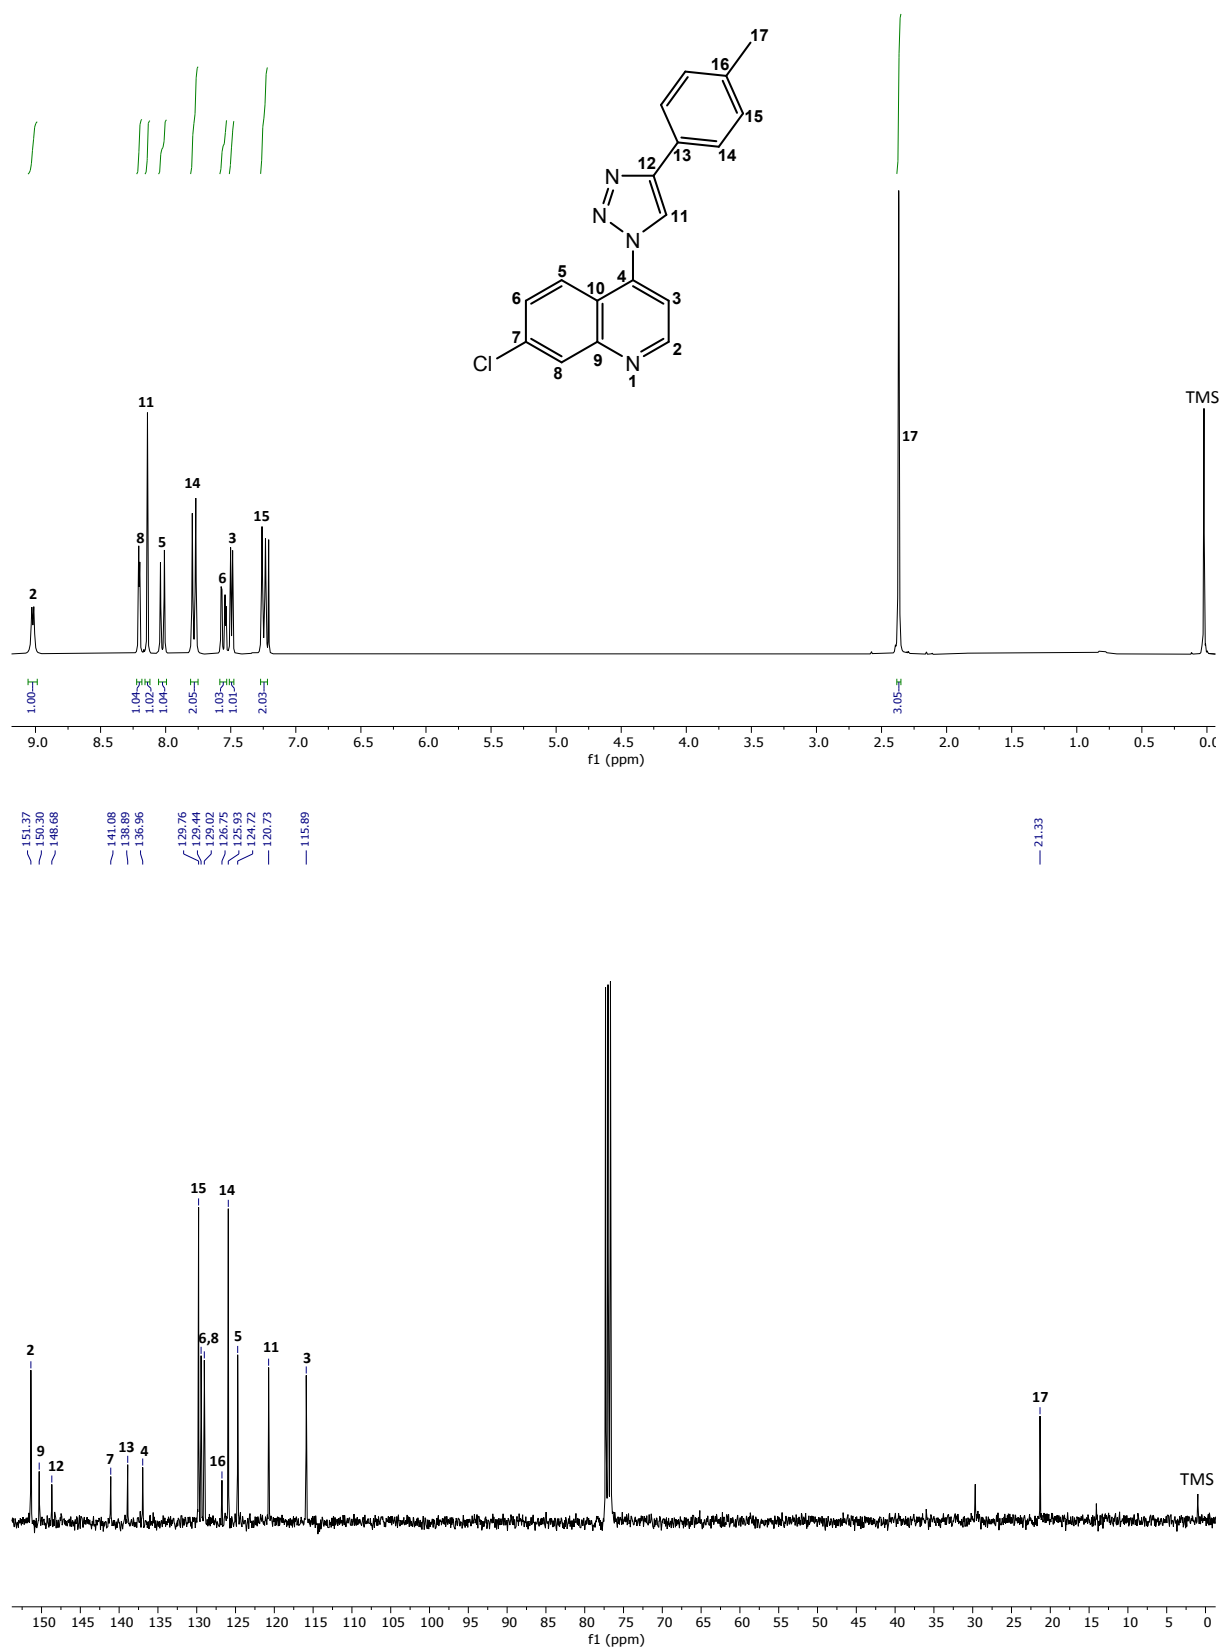

**Figure S2:**  $^1\text{H}$  and  $^{13}\text{C}\{^1\text{H}\}$  NMR spectra of **2b** in  $\text{CDCl}_3$ .

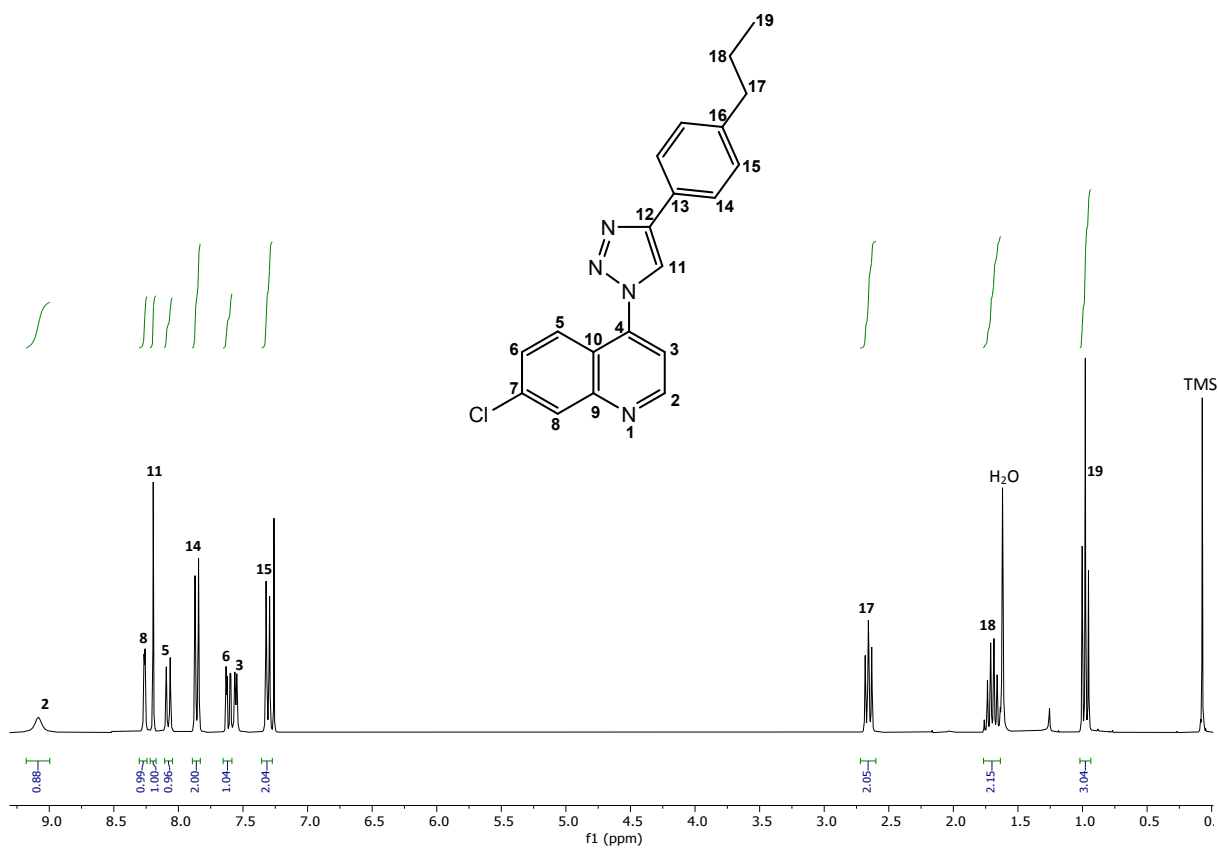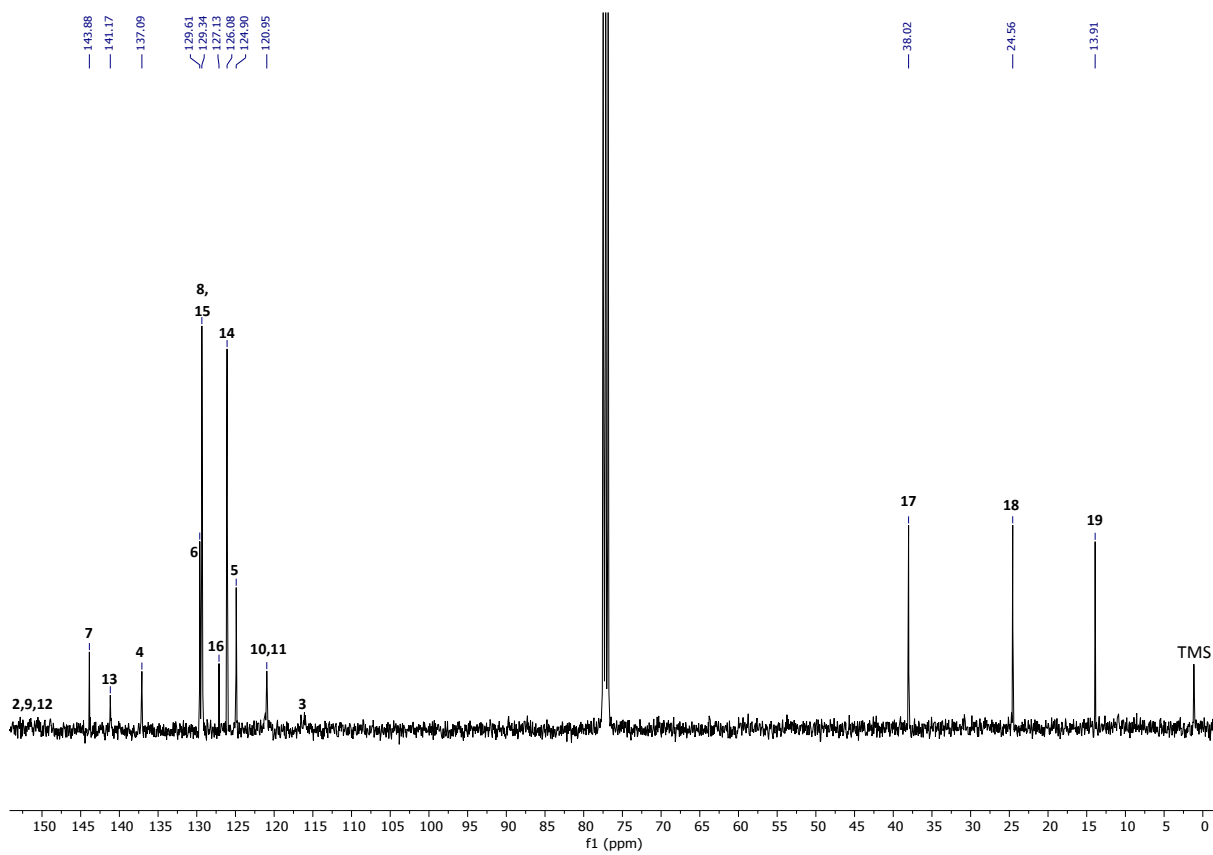

Figure S3: <sup>1</sup>H and <sup>13</sup>C{<sup>1</sup>H} NMR spectra of 2c in CDCl<sub>3</sub>.

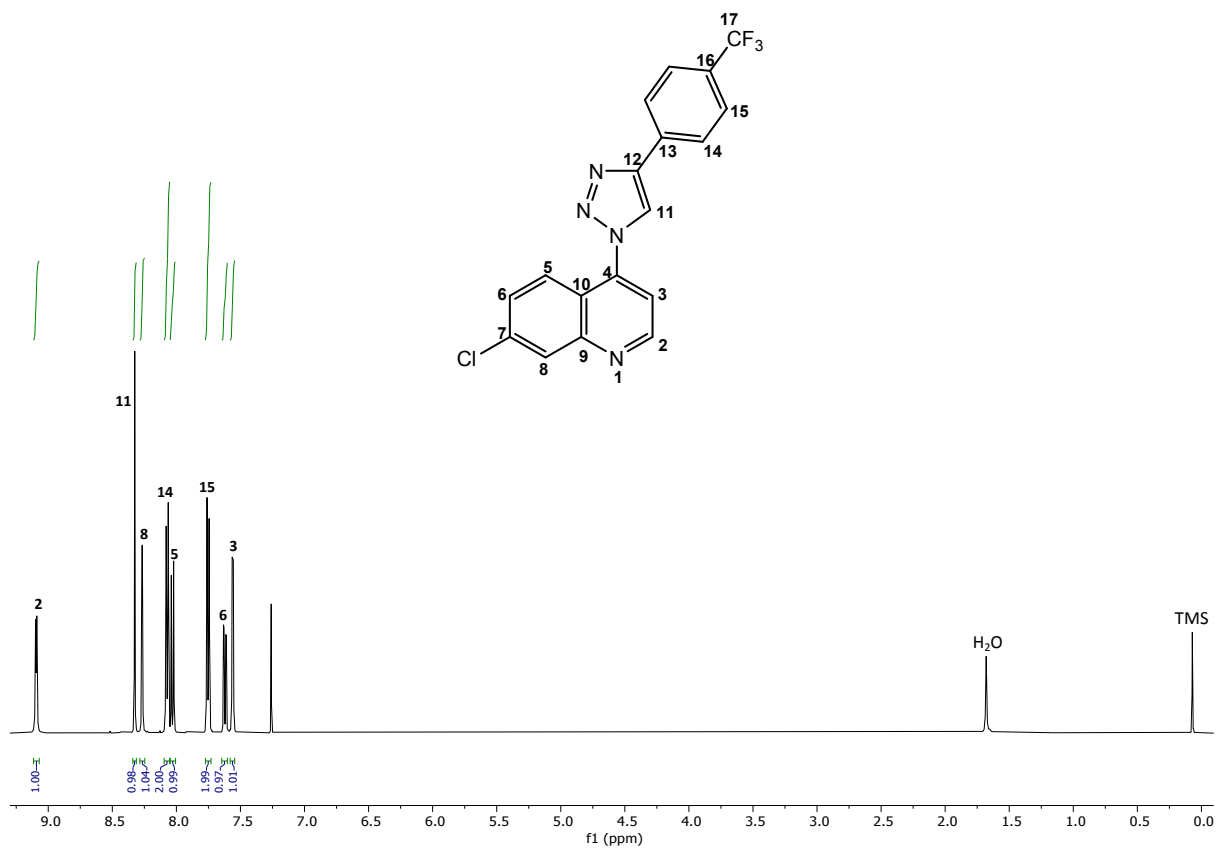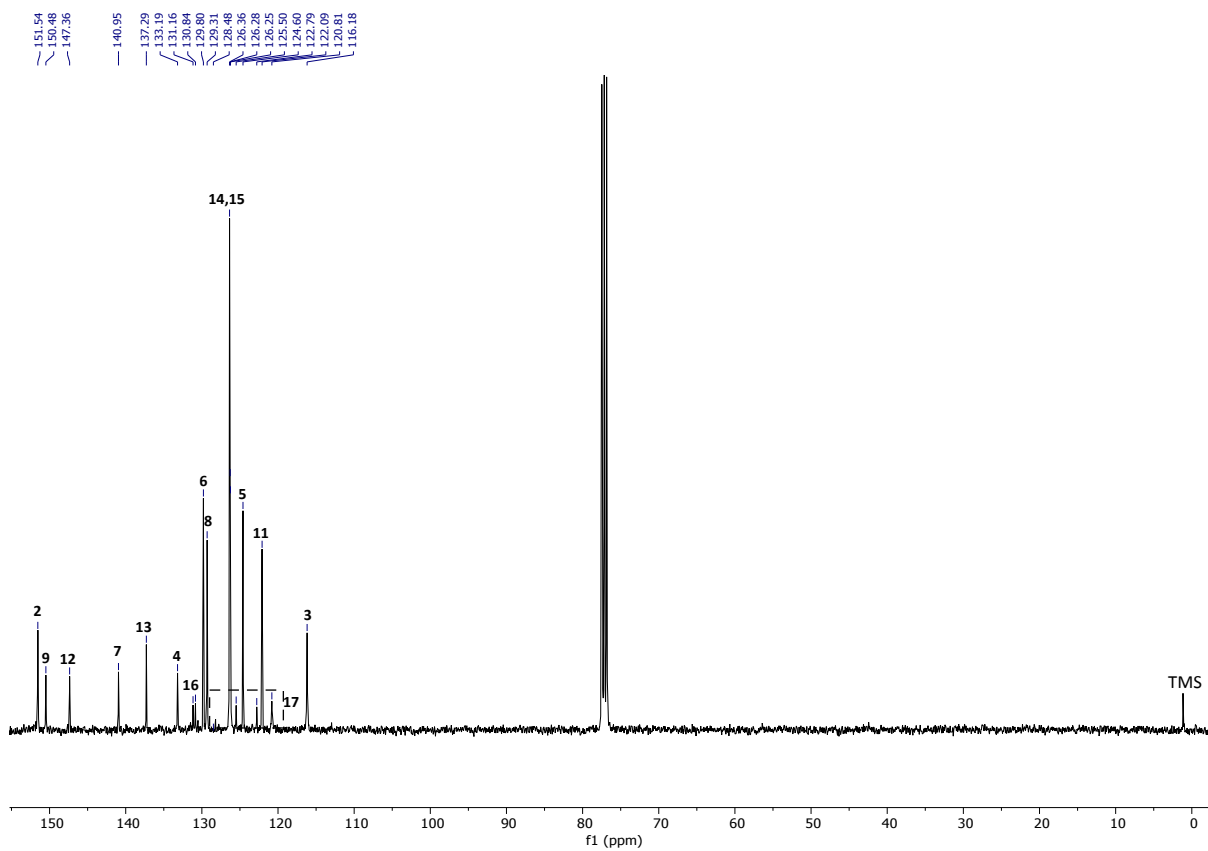

Figure S4:  $^1\text{H}$  and  $^{13}\text{C}\{^1\text{H}\}$  NMR spectra of **2d** in CDCl<sub>3</sub>.

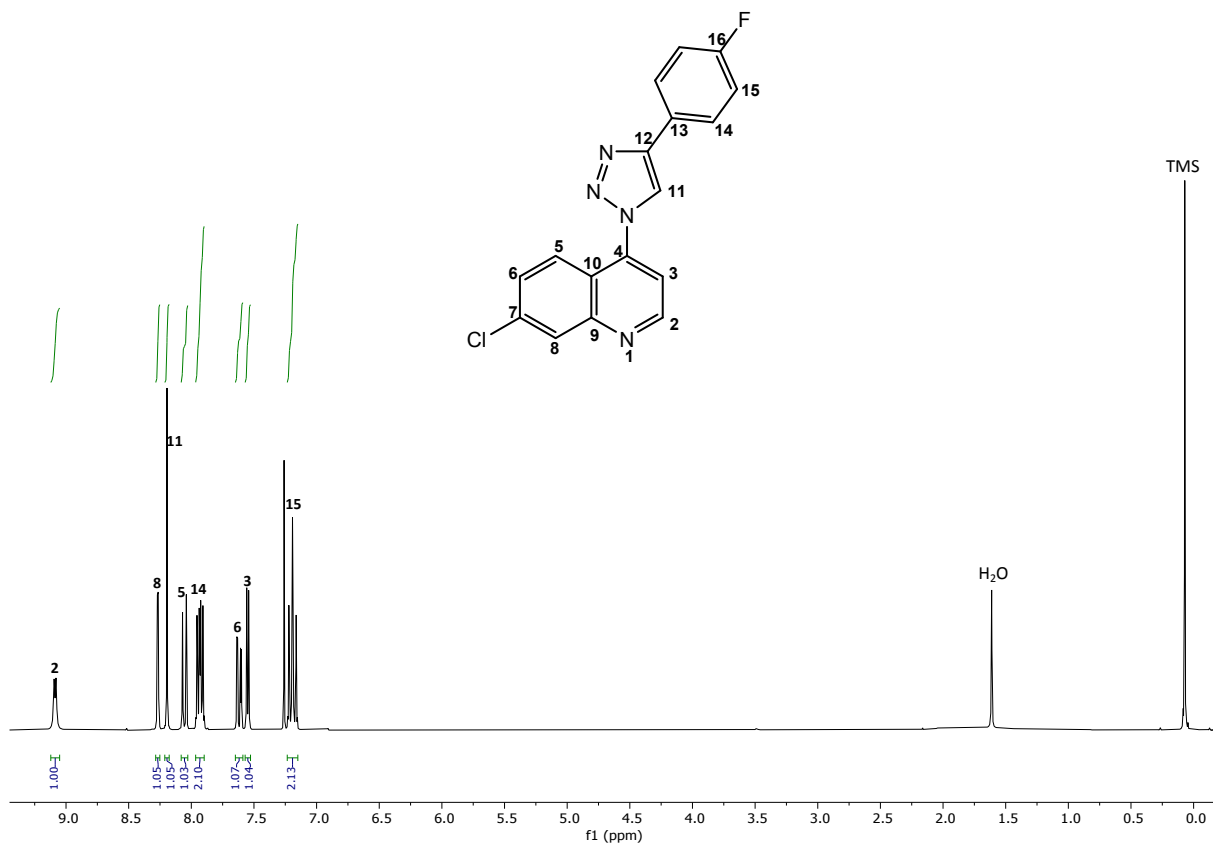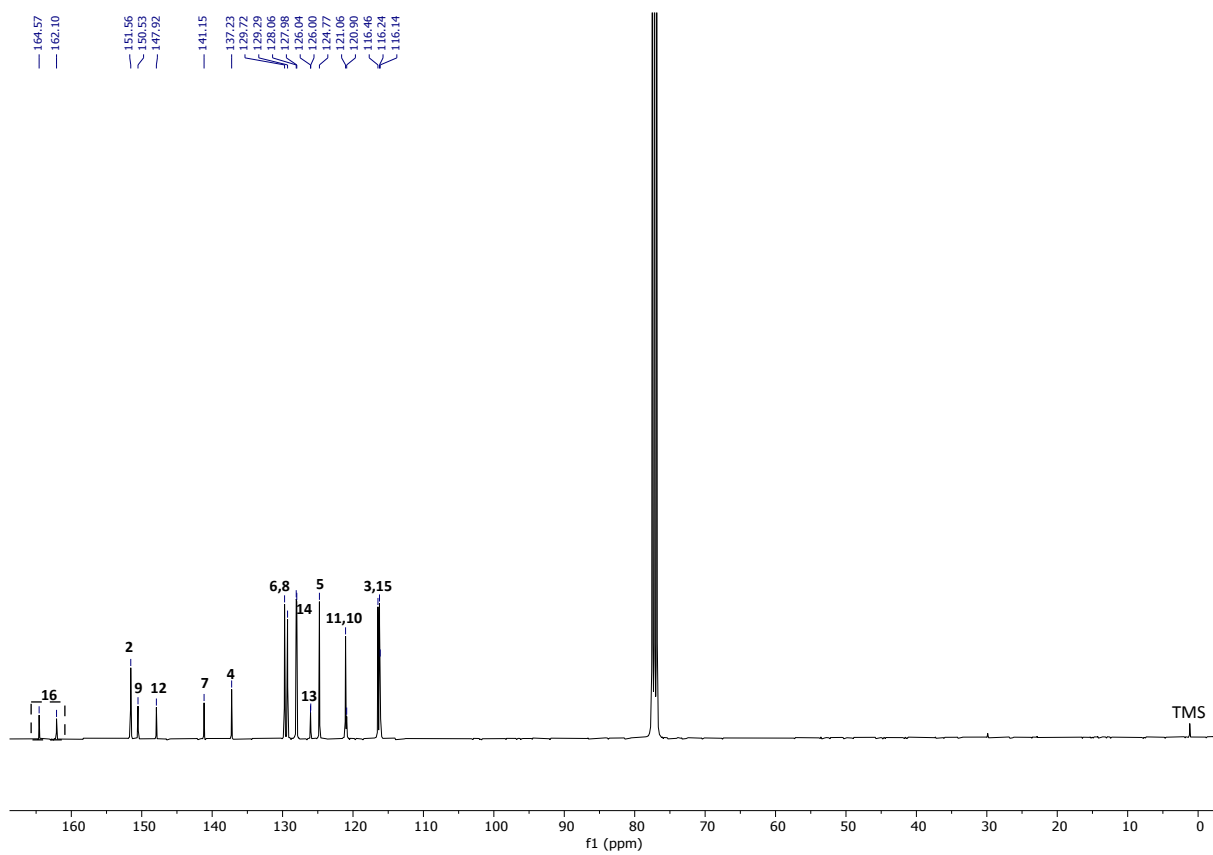

Figure S5:  $^1\text{H}$  and  $^{13}\text{C}\{^1\text{H}\}$  NMR spectra of **2e** in  $\text{CDCl}_3$ .

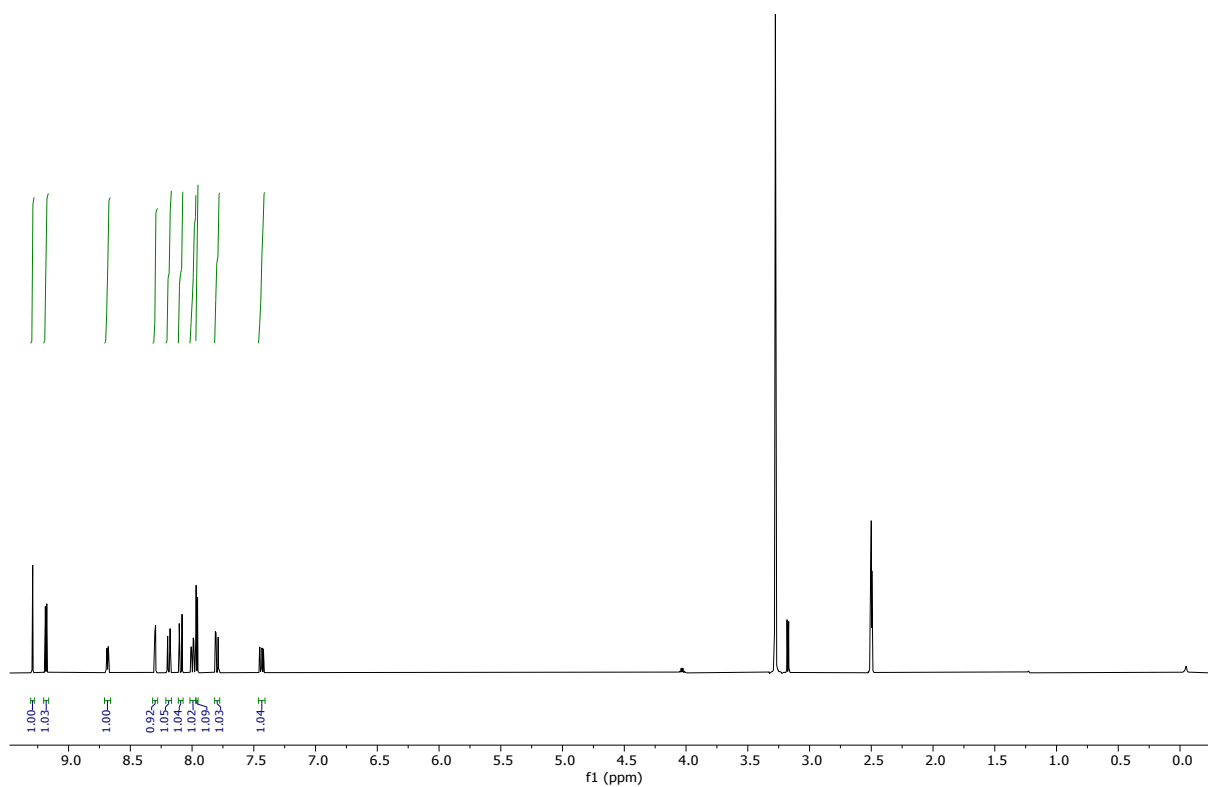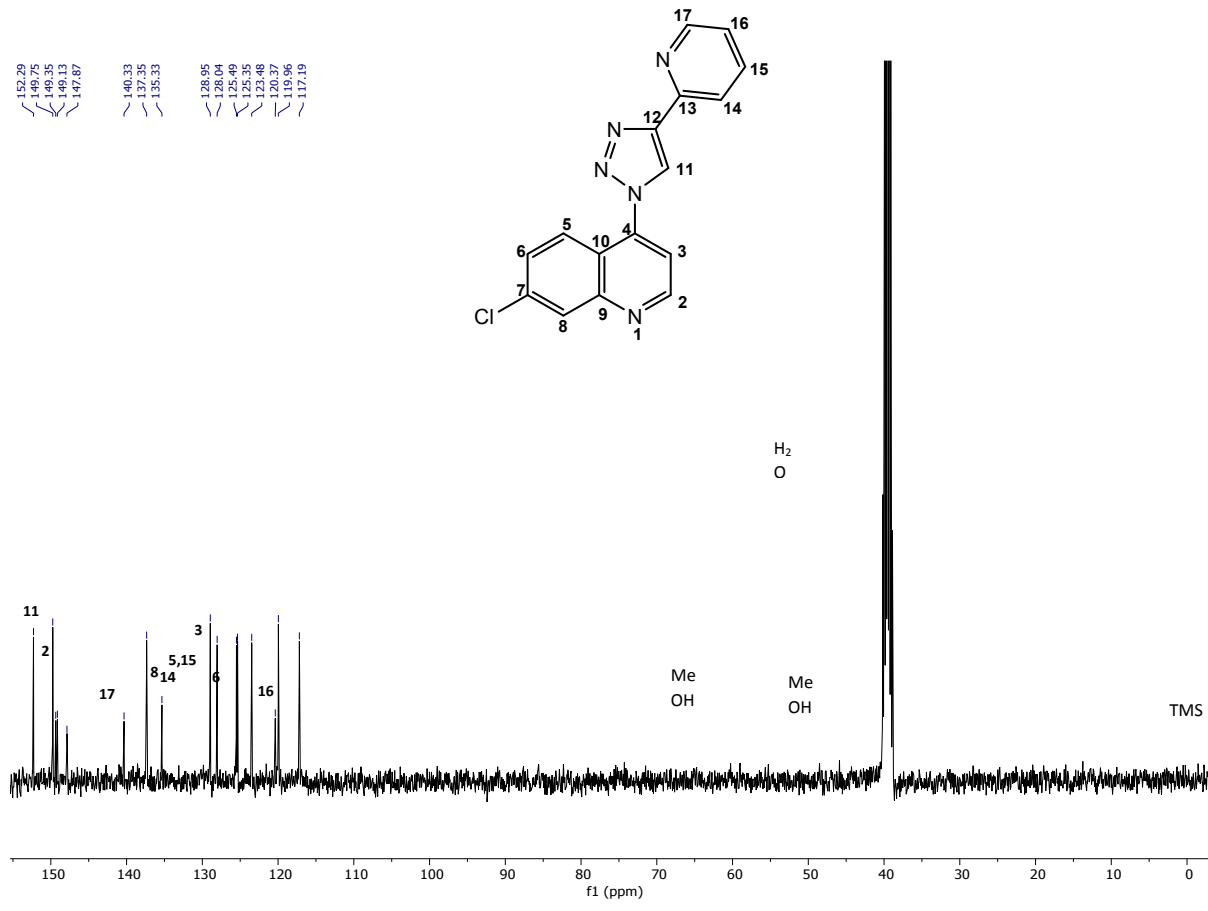



Figure S6:  $^1\text{H}$  and  $^{13}\text{C}\{^1\text{H}\}$  NMR spectra of **2f** in  $\text{DMSO-}d_6$ .

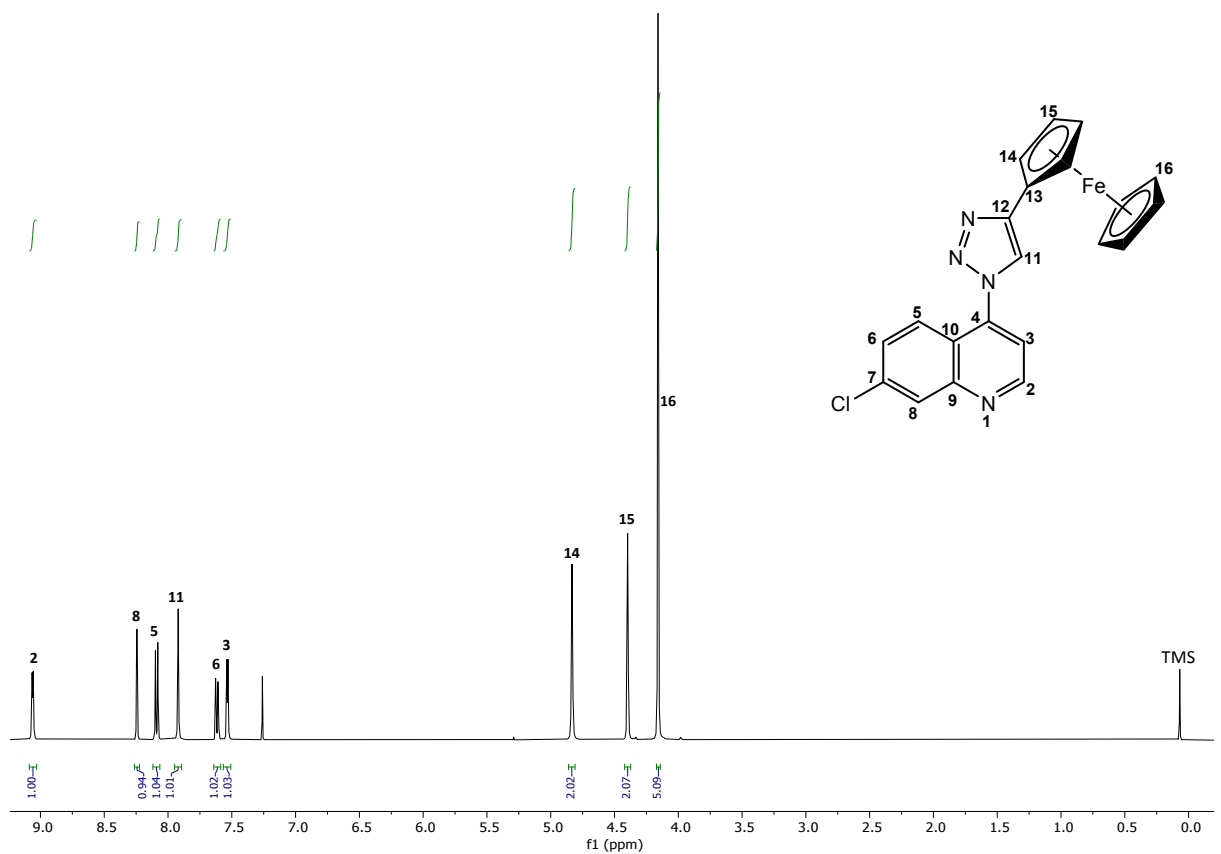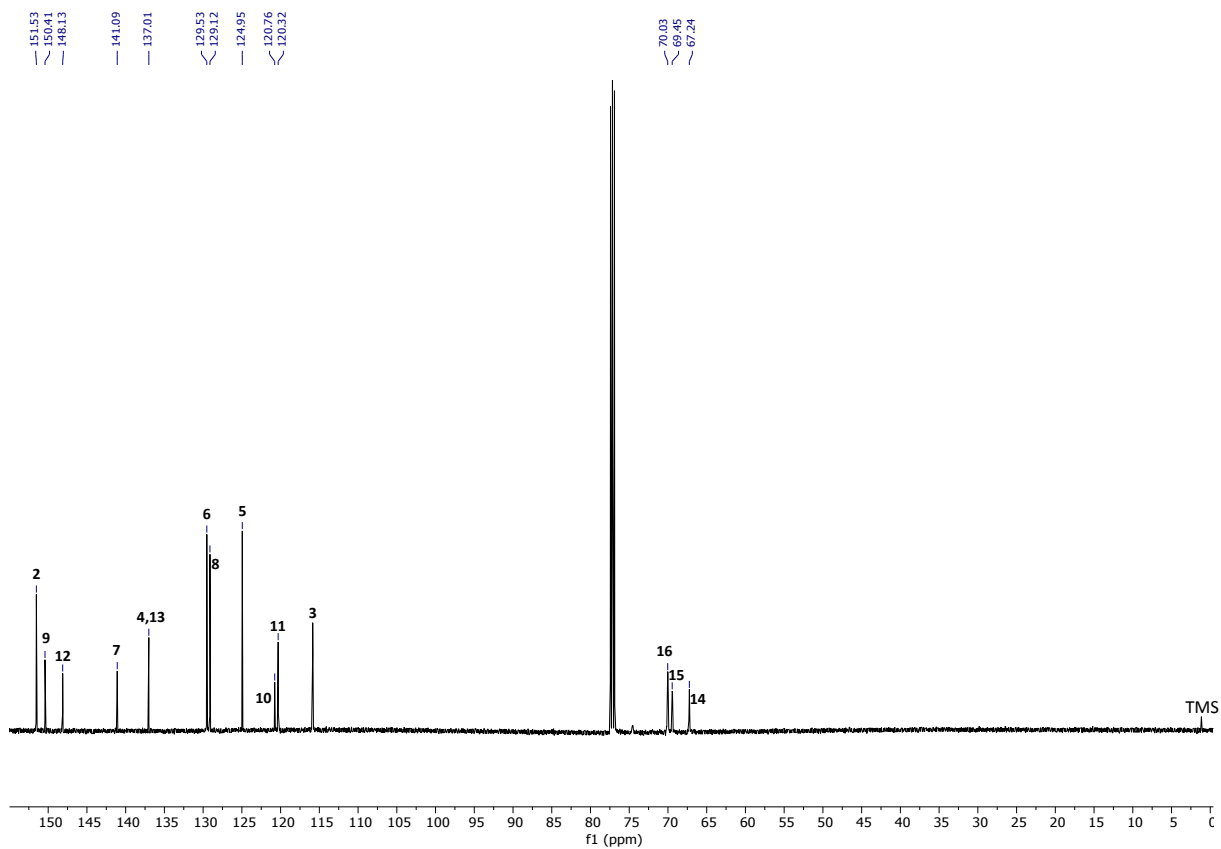

**Figure S7:**  $^1\text{H}$  and  $^{13}\text{C}\{^1\text{H}\}$  NMR spectra of **2g** in  $\text{CDCl}_3$ .

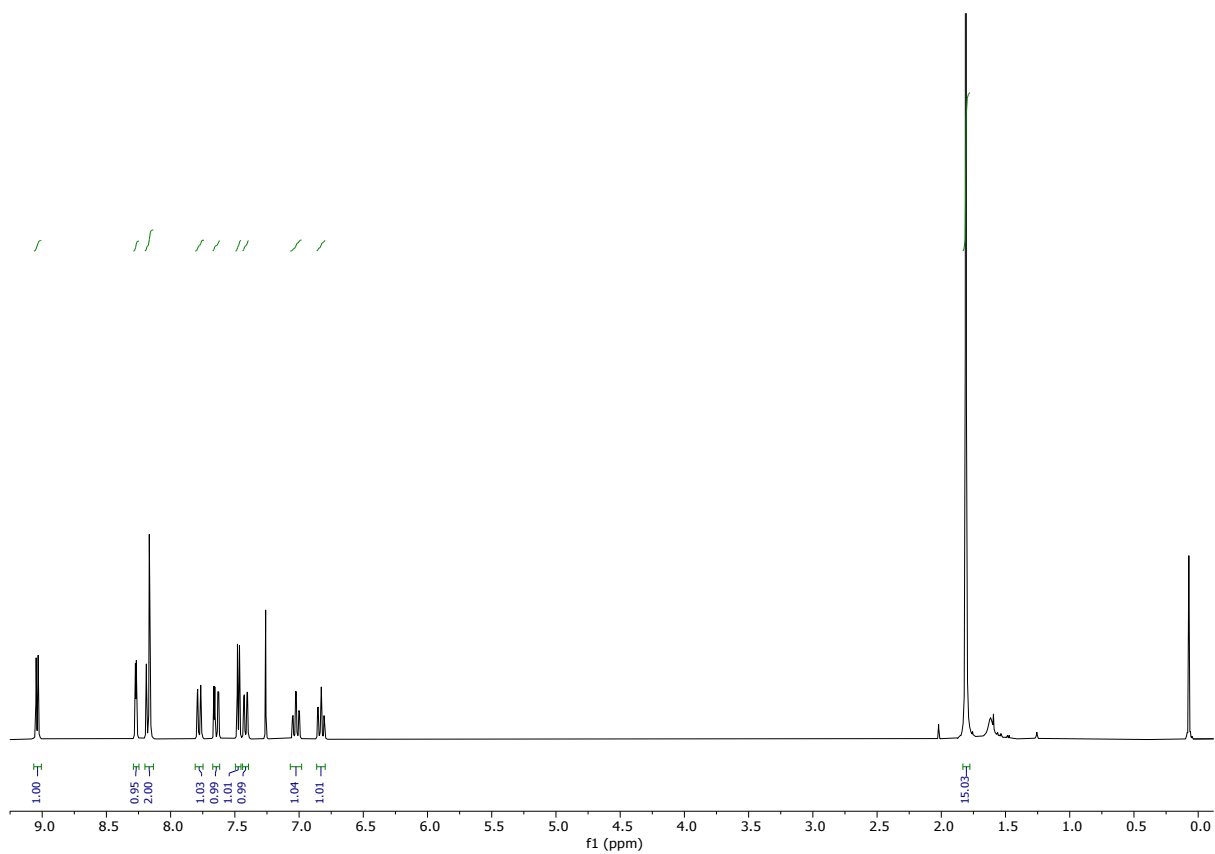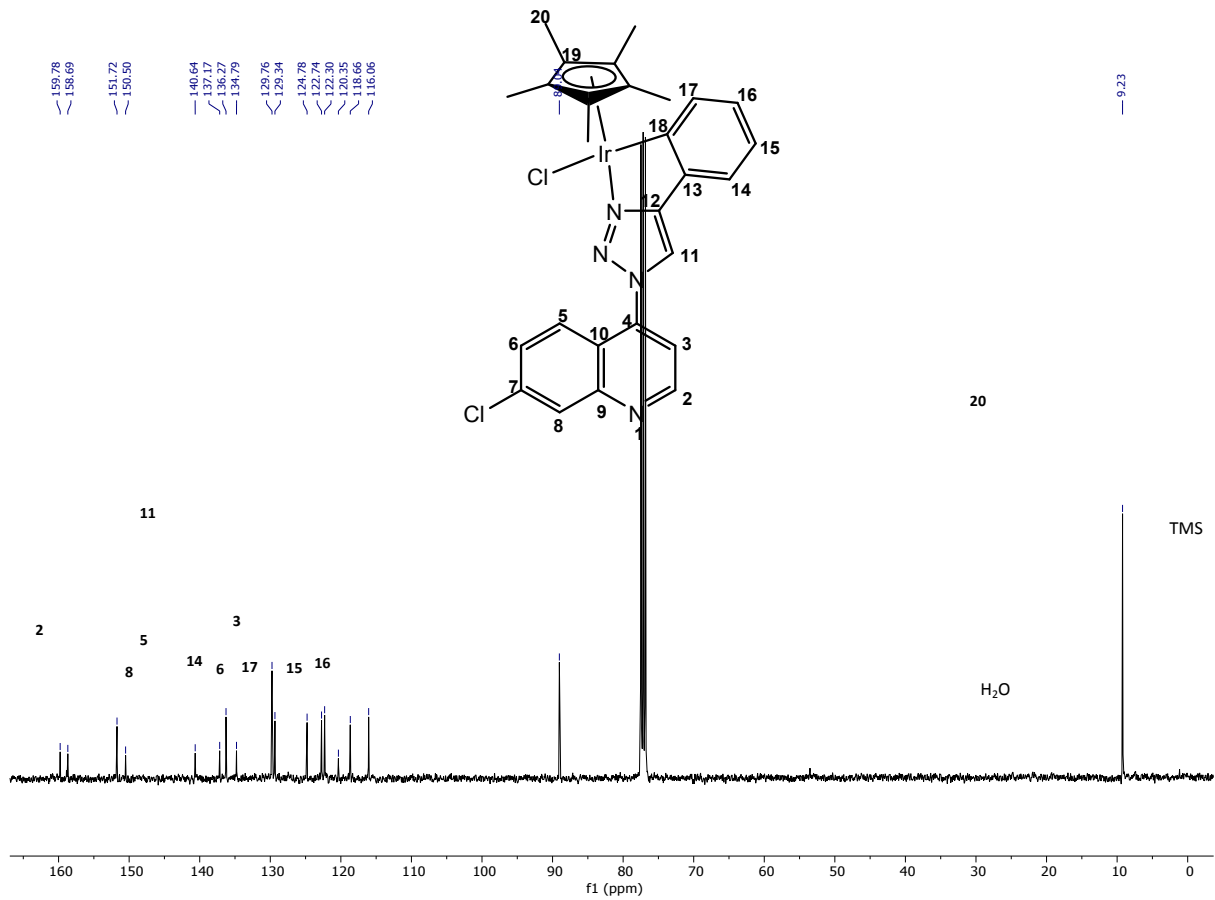

Figure S8:  $^1\text{H}$  and  $^{13}\text{C}\{^1\text{H}\}$  NMR spectra of **3a** in  $\text{CDCl}_3$ .

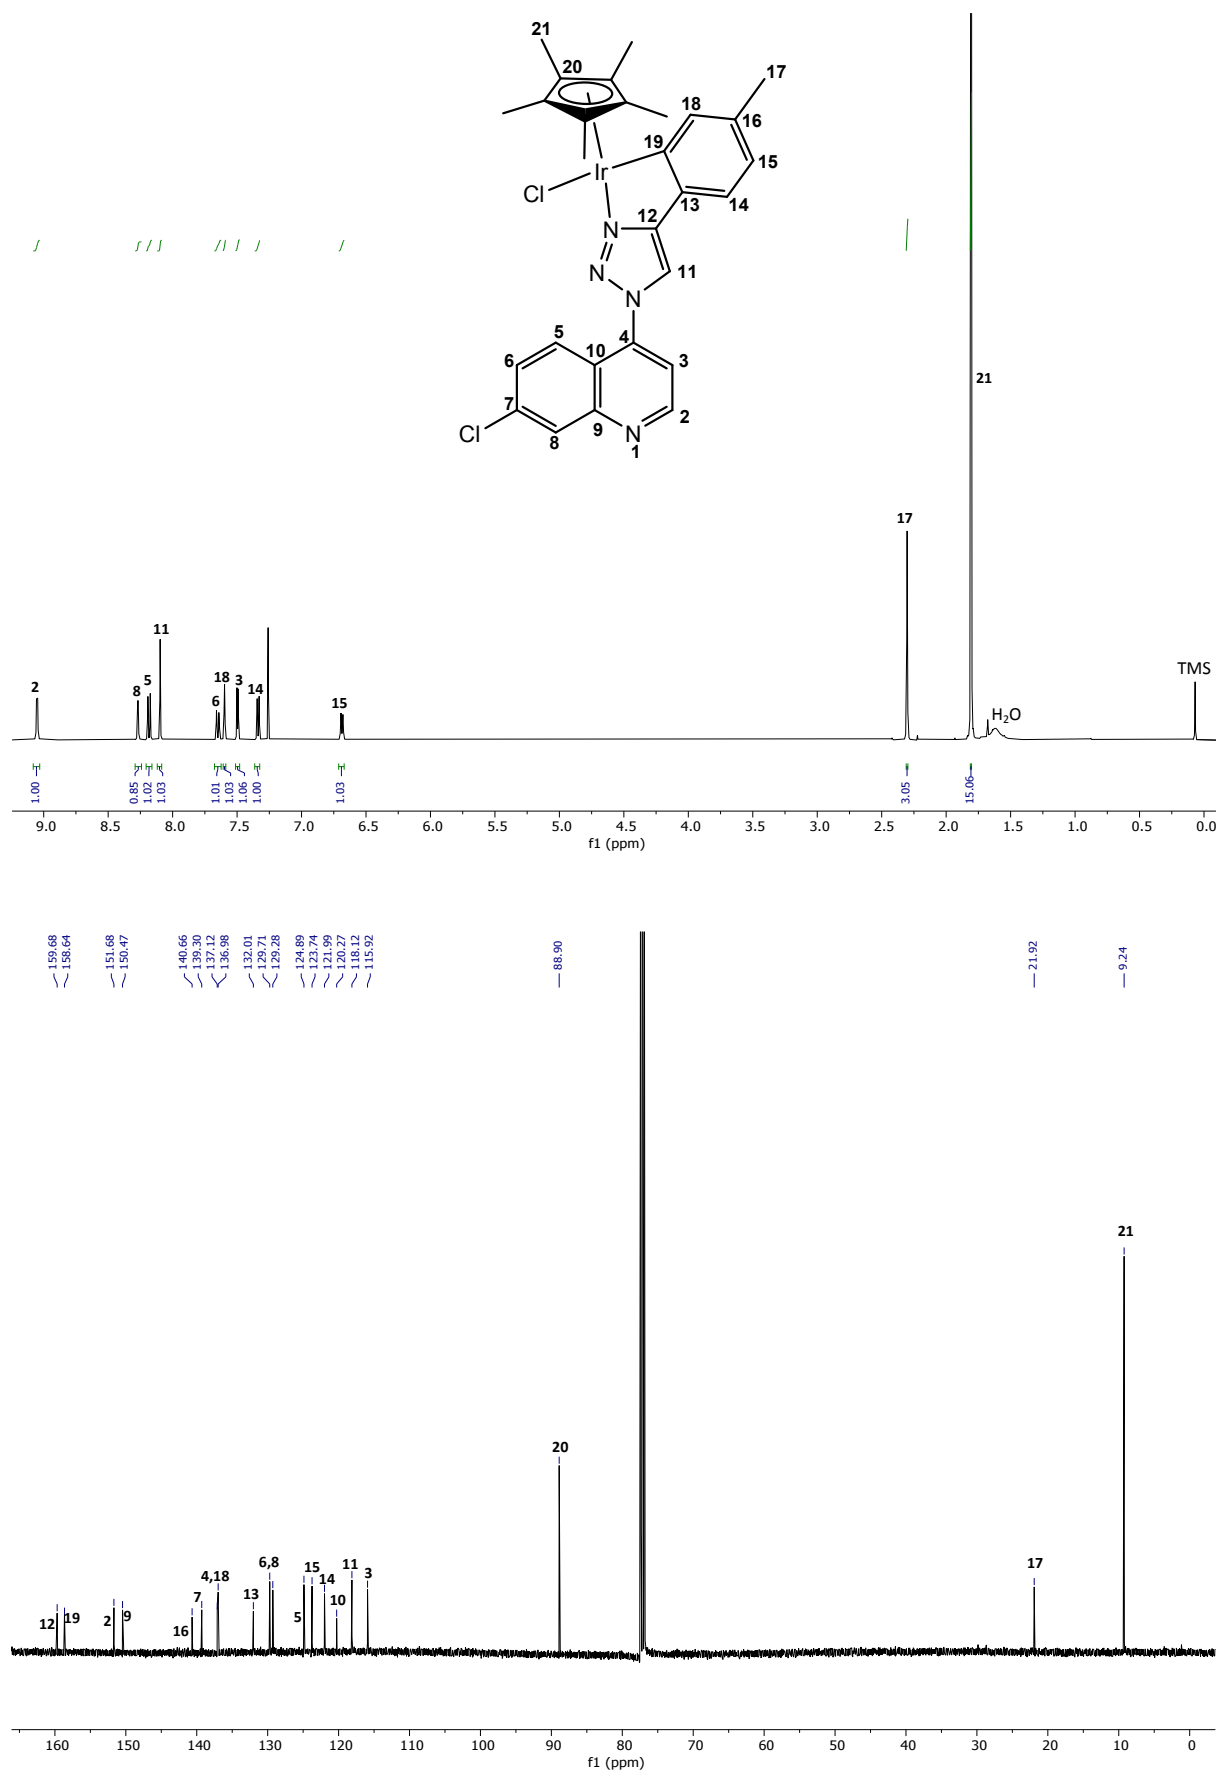

Figure S9:  $^1\text{H}$  and  $^{13}\text{C}\{^1\text{H}\}$  NMR spectra of **3b** in  $\text{CDCl}_3$ .

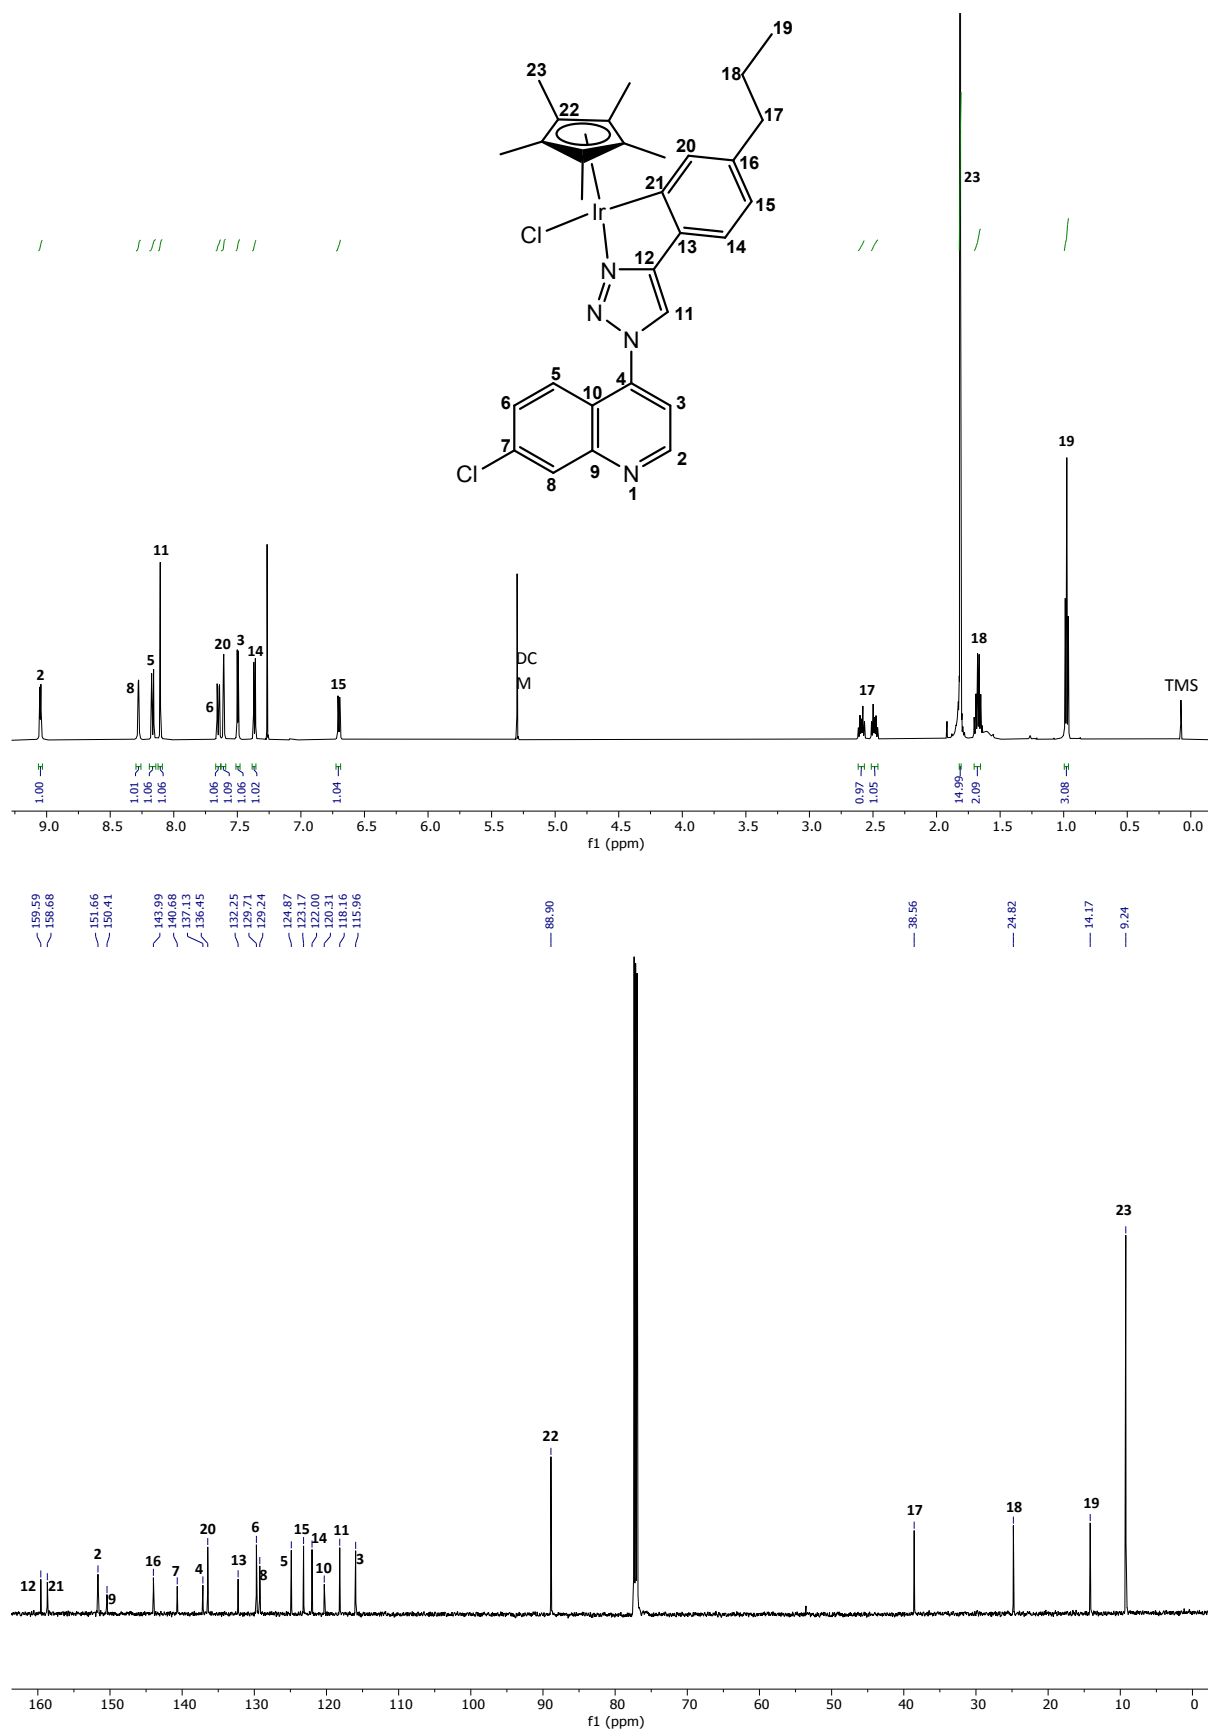

**Figure S10:**  $^1\text{H}$  and  $^{13}\text{C}\{^1\text{H}\}$  NMR spectra of **3c** in  $\text{CDCl}_3$ .

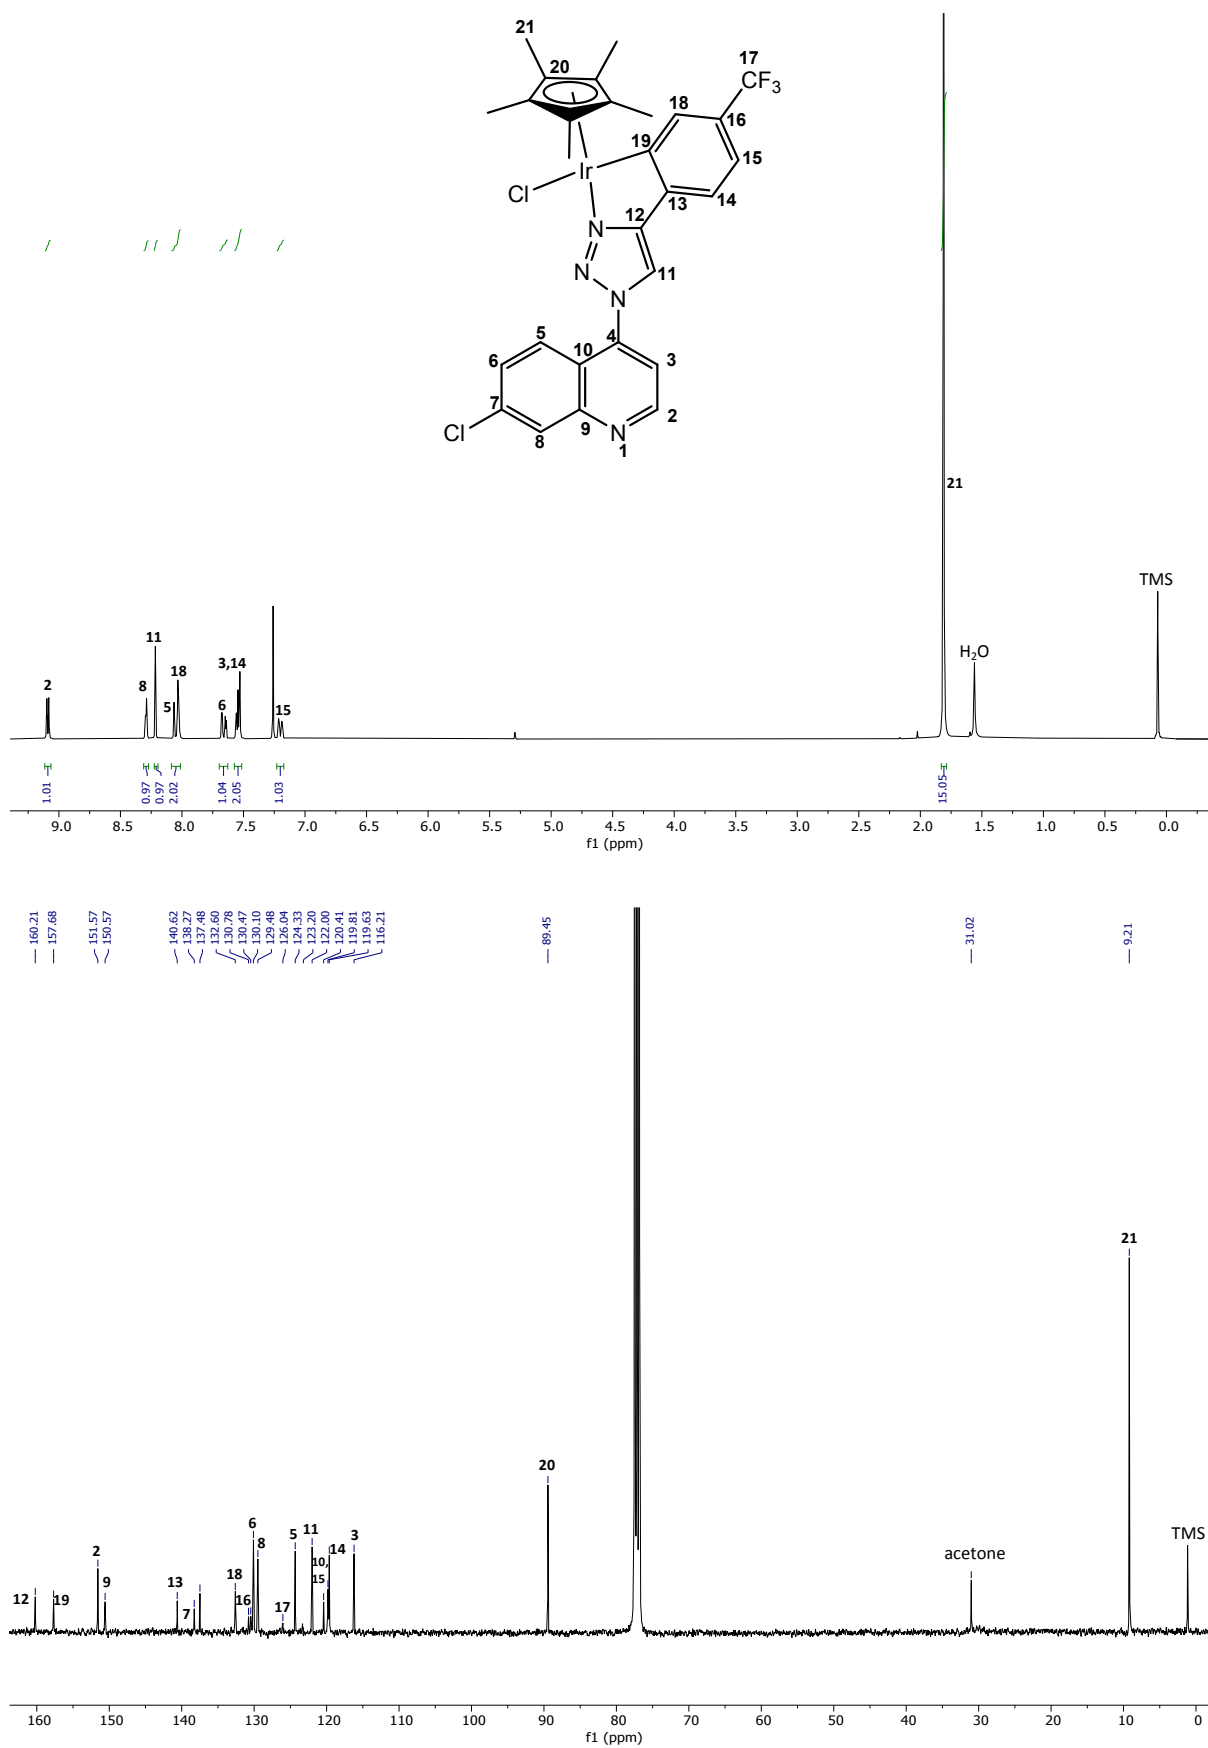

Figure S11: <sup>1</sup>H and <sup>13</sup>C{<sup>1</sup>H} NMR spectra of **3d** in CDCl<sub>3</sub>.

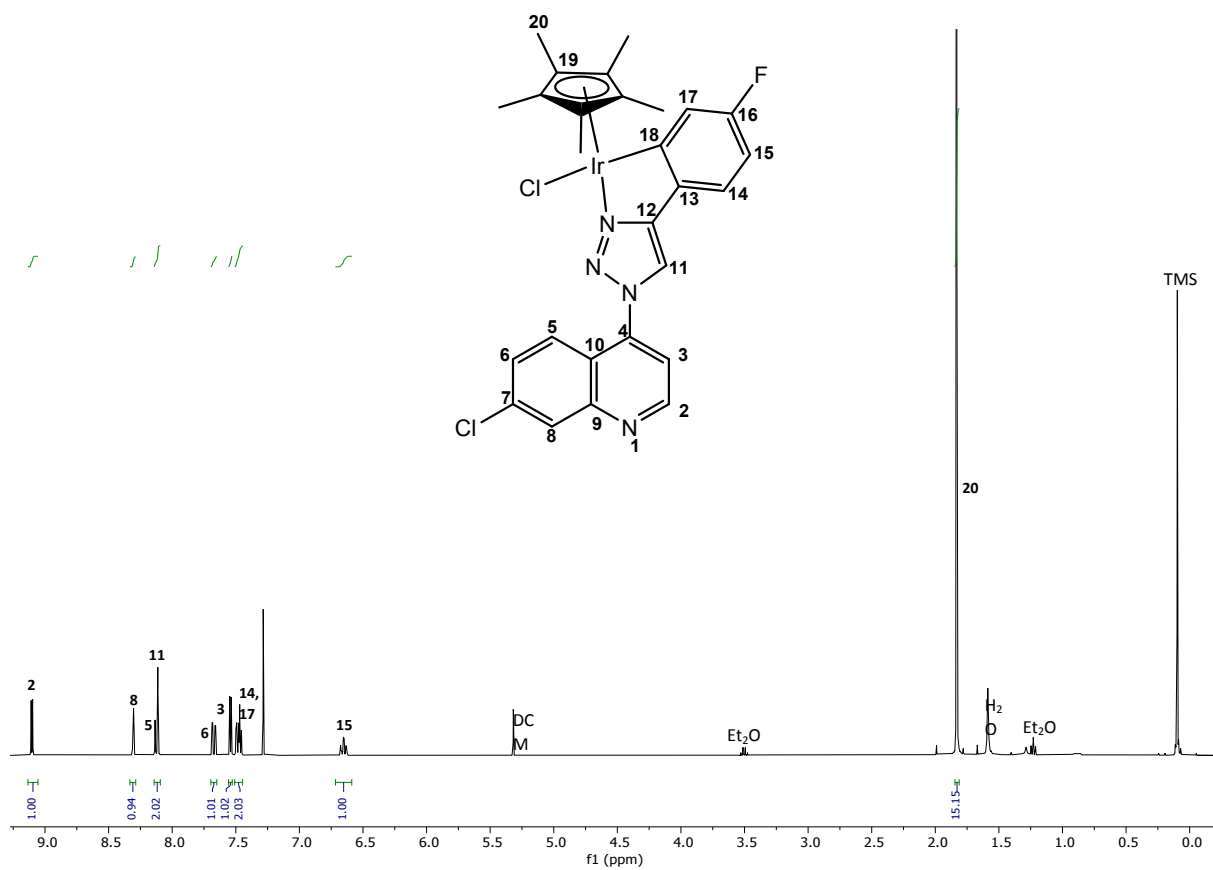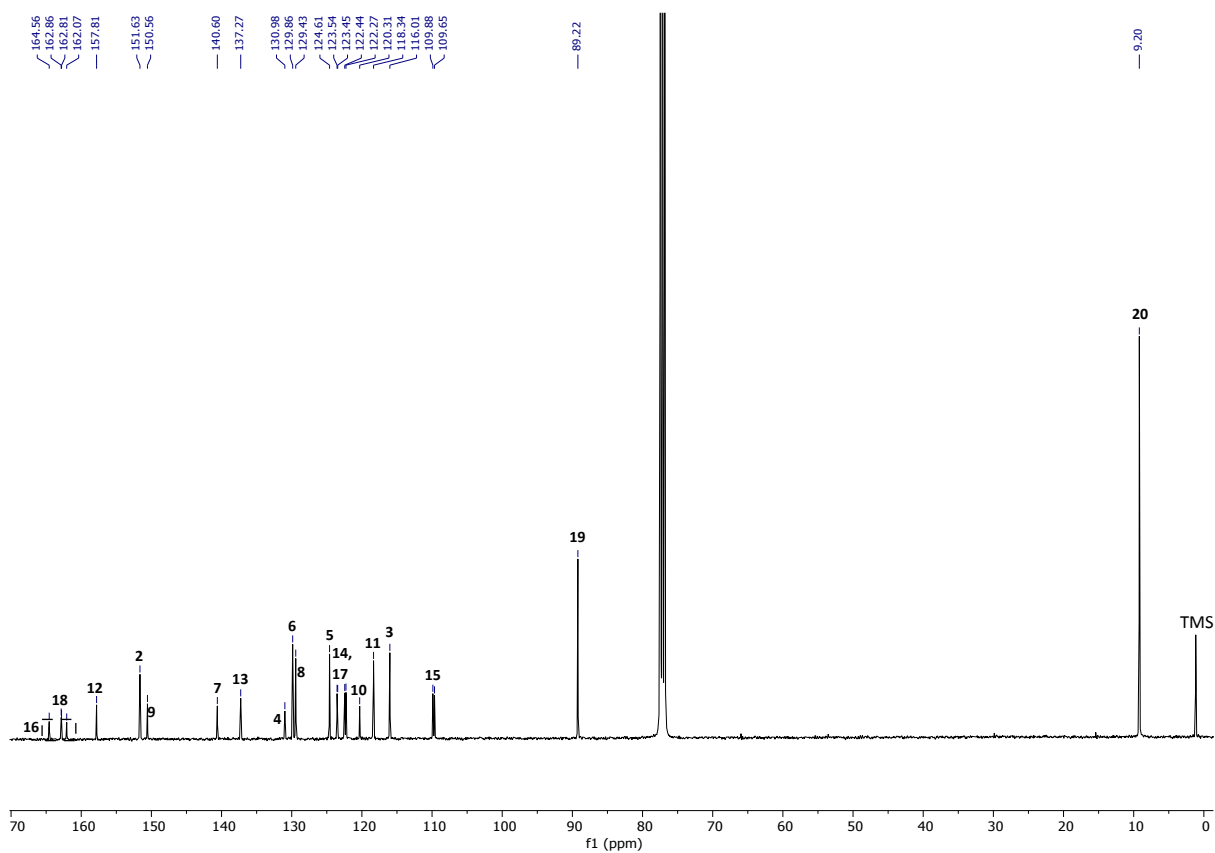

**Figure S12:** <sup>1</sup>H and <sup>13</sup>C{<sup>1</sup>H} NMR spectra of **3e** in CDCl<sub>3</sub>.



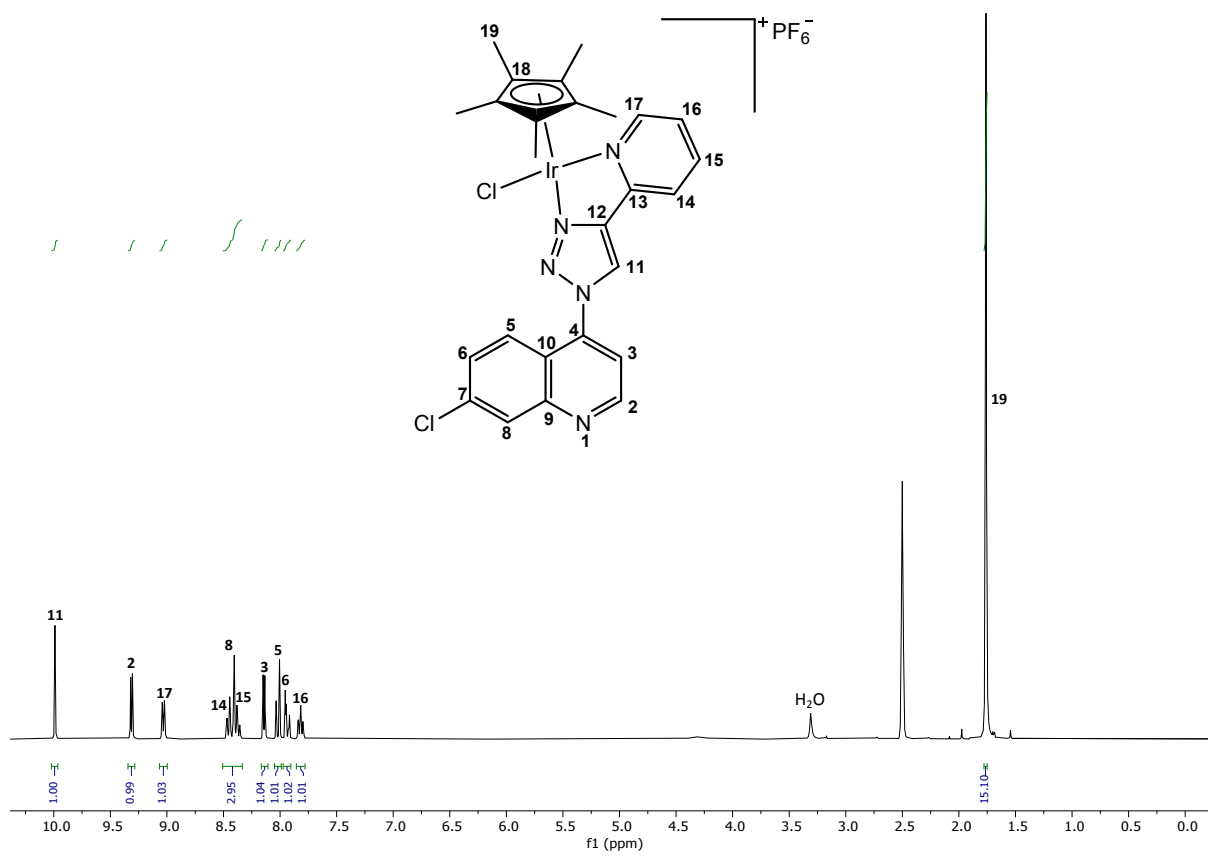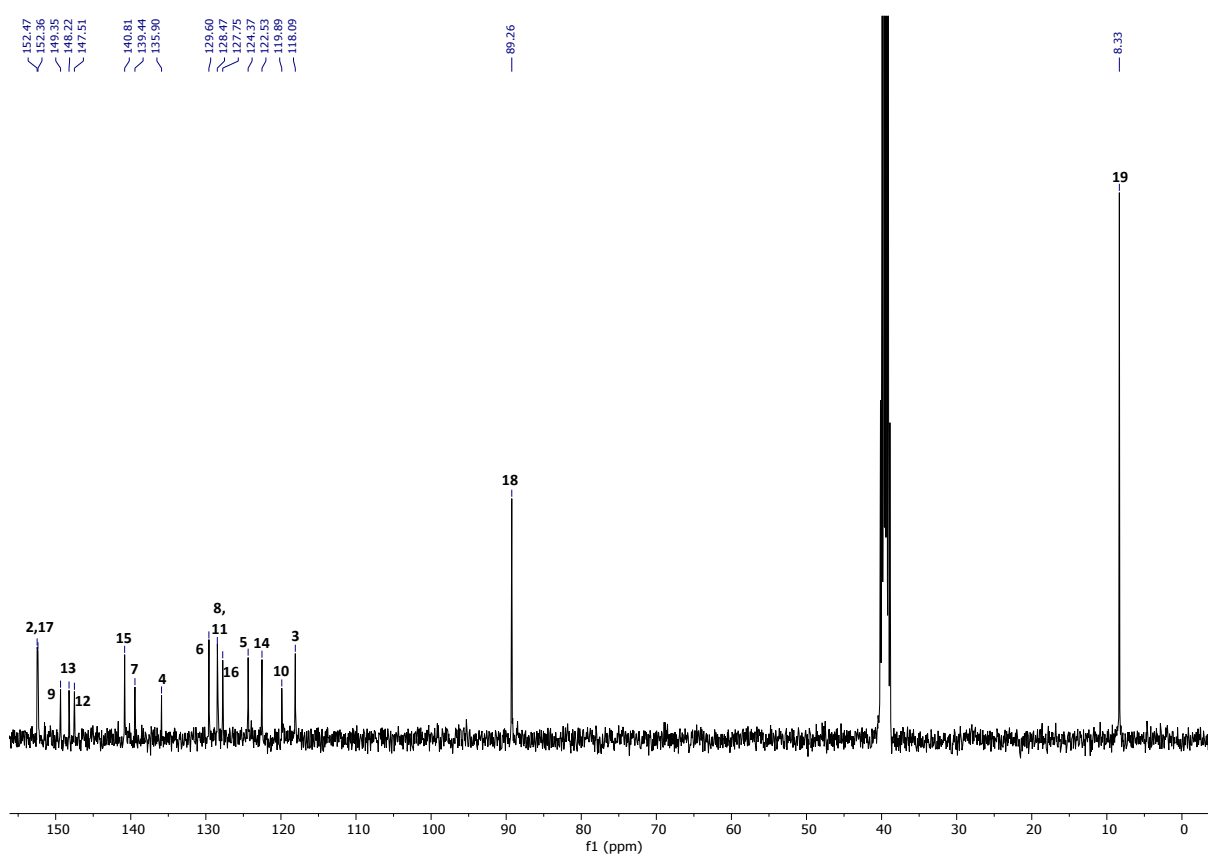

Figure S13:  $^1\text{H}$  and  $^{13}\text{C}\{^1\text{H}\}$  NMR spectra of **3f** in  $\text{DMSO-}d_6$ .

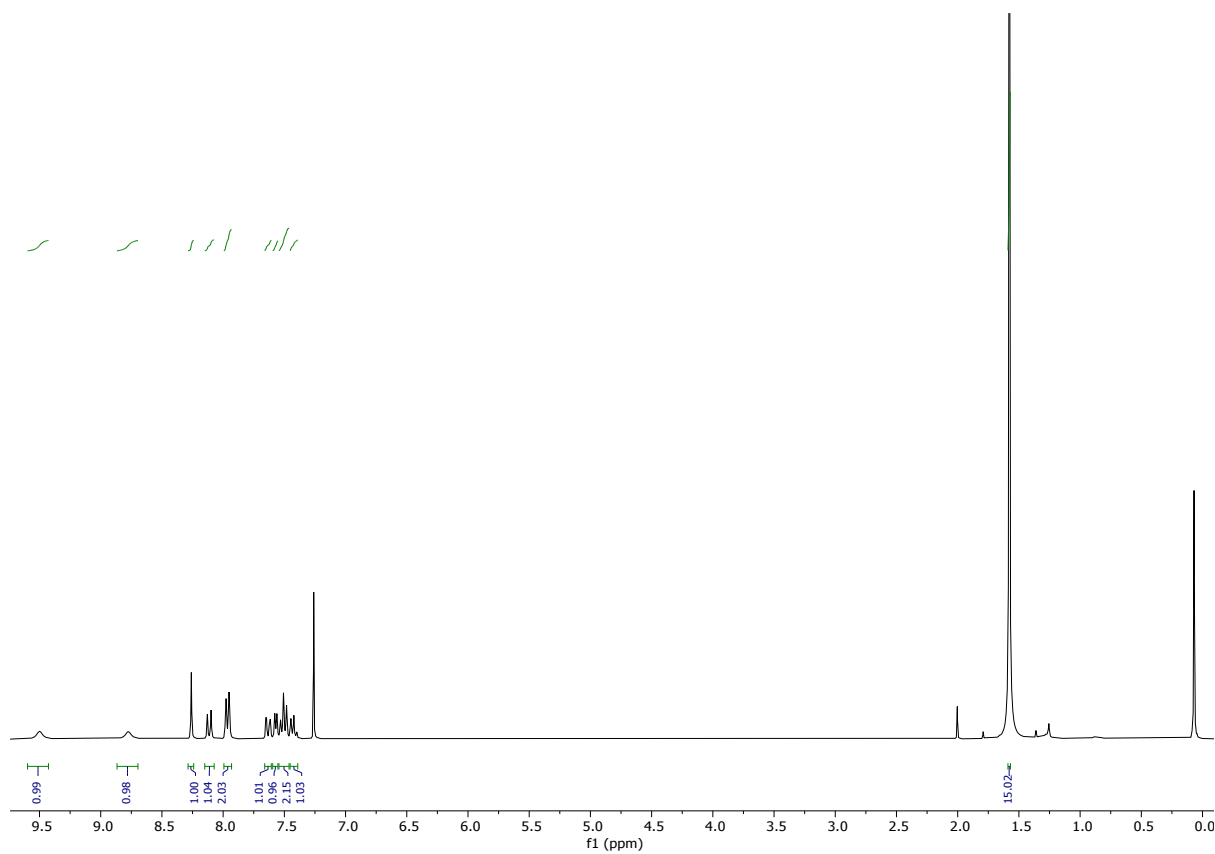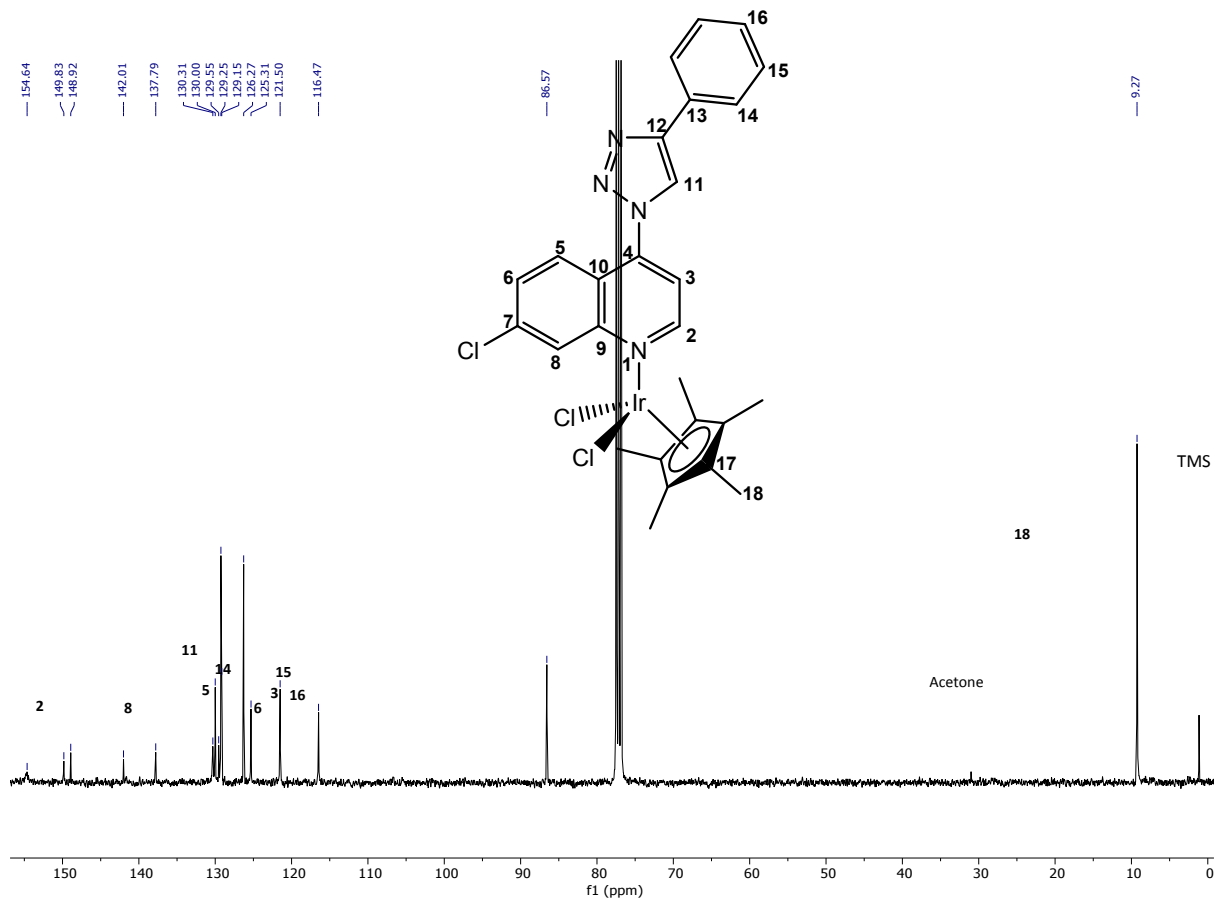

**Figure S14:**  $^1\text{H}$  and  $^{13}\text{C}\{^1\text{H}\}$  NMR spectra of **4** in  $\text{CDCl}_3$ .

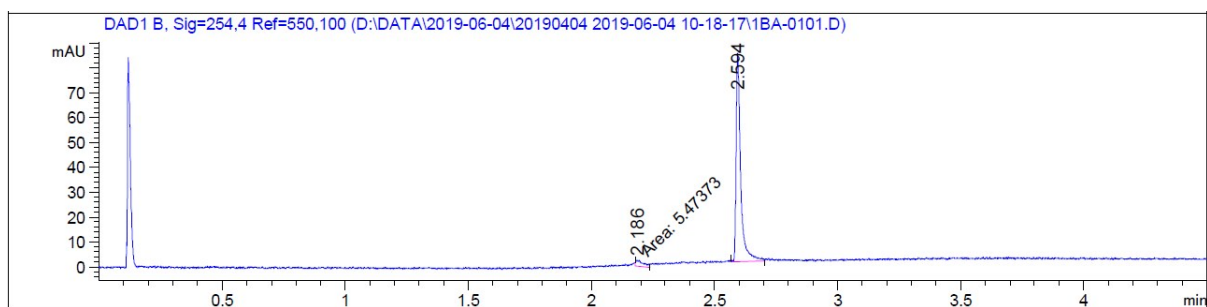

Signal 2: DAD1 B, Sig=254,4 Ref=550,100

| Peak # | RetTime [min] | Type | Width [min] | Area [mAU*s] | Height [mAU] | Area %  |
|--------|---------------|------|-------------|--------------|--------------|---------|
| 1      | 2.186         | MM   | 0.0383      | 5.47373      | 2.38028      | 4.7954  |
| 2      | 2.594         | VV   | 0.0186      | 108.67117    | 83.75558     | 95.2046 |

Totals : 114.14490 86.13586

**Figure S15:** Purity by LCMS of **2a**.

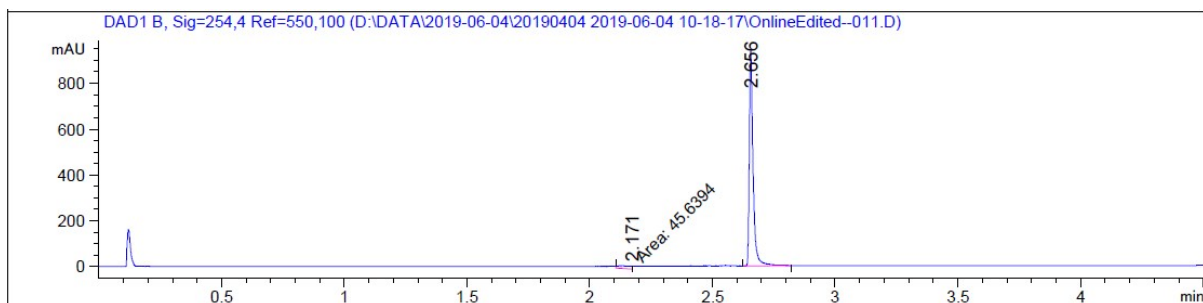

Signal 2: DAD1 B, Sig=254,4 Ref=550,100

| Peak # | RetTime [min] | Type | Width [min] | Area [mAU*s] | Height [mAU] | Area %  |
|--------|---------------|------|-------------|--------------|--------------|---------|
| 1      | 2.171         | MM   | 0.0594      | 45.63942     | 12.80264     | 4.2766  |
| 2      | 2.656         | BV   | 0.0162      | 1021.55823   | 935.88043    | 95.7234 |

Totals : 1067.19765 948.68307

**Figure S16:** Purity by LCMS of **2b**.

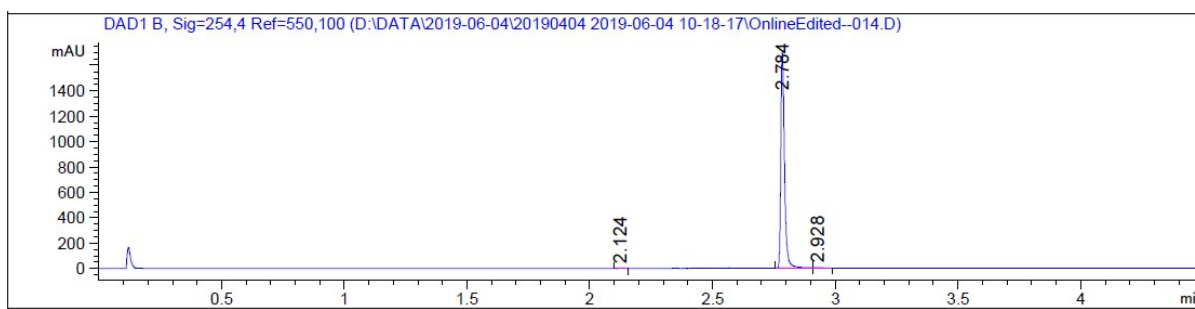

Signal 2: DAD1 B, Sig=254,4 Ref=550,100

| Peak # | RetTime [min] | Type | Width [min] | Area [mAU*s] | Height [mAU] | Area %  |
|--------|---------------|------|-------------|--------------|--------------|---------|
| 1      | 2.124         | VV   | 0.0275      | 5.83512      | 2.66571      | 0.3250  |
| 2      | 2.784         | BV   | 0.0158      | 1782.15259   | 1691.24084   | 99.2549 |
| 3      | 2.928         | VB   | 0.0313      | 7.54264      | 3.10419      | 0.4201  |

Totals : 1795.53035 1697.01075

Figure S17: Purity by LCMS of 2c.

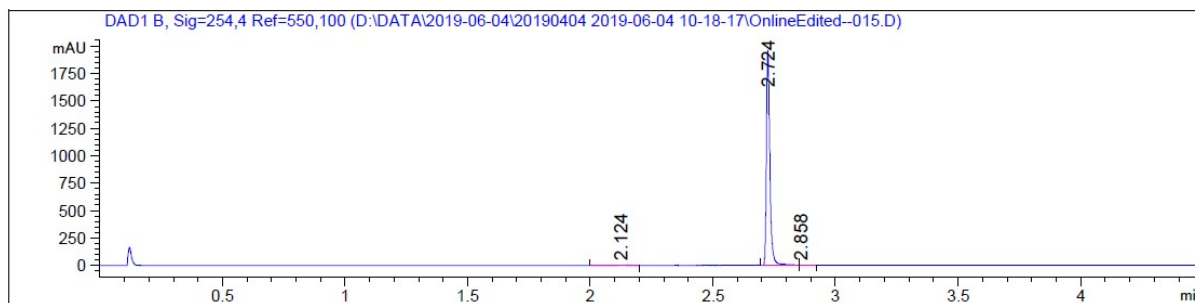

Signal 2: DAD1 B, Sig=254,4 Ref=550,100

| Peak # | RetTime [min] | Type | Width [min] | Area [mAU*s] | Height [mAU] | Area %  |
|--------|---------------|------|-------------|--------------|--------------|---------|
| 1      | 2.124         | VV   | 0.0442      | 10.03746     | 2.74075      | 0.5174  |
| 2      | 2.724         | BV   | 0.0150      | 1923.61304   | 1947.41528   | 99.1506 |
| 3      | 2.858         | VV   | 0.0306      | 6.44185      | 2.58458      | 0.3320  |

Totals : 1940.09235 1952.74062

Figure S18: Purity by LCMS of 2d.

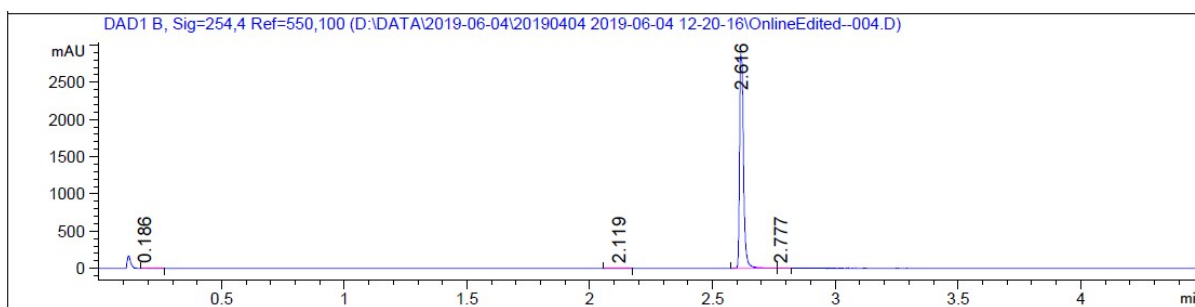

Signal 2: DAD1 B, Sig=254,4 Ref=550,100

| Peak # | RetTime [min] | Type | Width [min] | Area [mAU*s] | Height [mAU] | Area %  |
|--------|---------------|------|-------------|--------------|--------------|---------|
| 1      | 0.186         | VB   | 0.0327      | 11.44019     | 4.42404      | 0.3537  |
| 2      | 2.119         | VV   | 0.0383      | 7.44550      | 2.42715      | 0.2302  |
| 3      | 2.616         | BV   | 0.0171      | 3208.91064   | 2856.87354   | 99.1979 |
| 4      | 2.777         | VV   | 0.0294      | 7.06062      | 3.18246      | 0.2183  |

Totals : 3234.85695 2866.90719

Figure S19: Purity by LCMS of 2e.

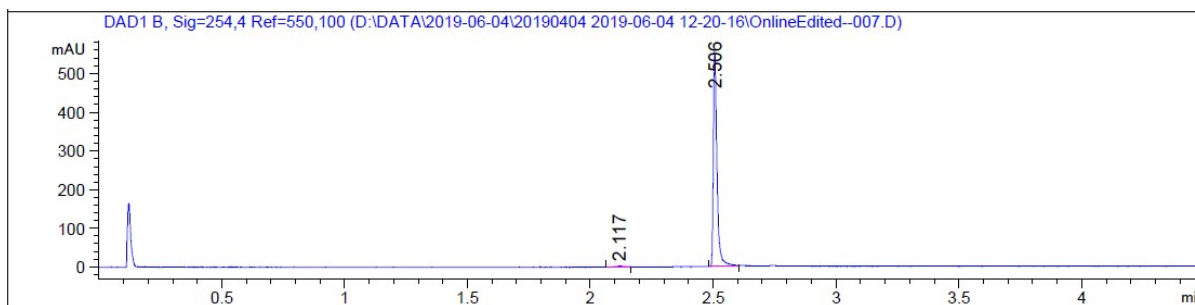

Signal 2: DAD1 B, Sig=254,4 Ref=550,100

| Peak # | RetTime [min] | Type | Width [min] | Area [mAU*s] | Height [mAU] | Area %  |
|--------|---------------|------|-------------|--------------|--------------|---------|
| 1      | 2.117         | VV   | 0.0356      | 7.76866      | 2.66153      | 1.3405  |
| 2      | 2.506         | BV   | 0.0155      | 571.75751    | 555.30829    | 98.6595 |

Totals : 579.52617 557.96982

Figure S20: Purity by LCMS of 2f.

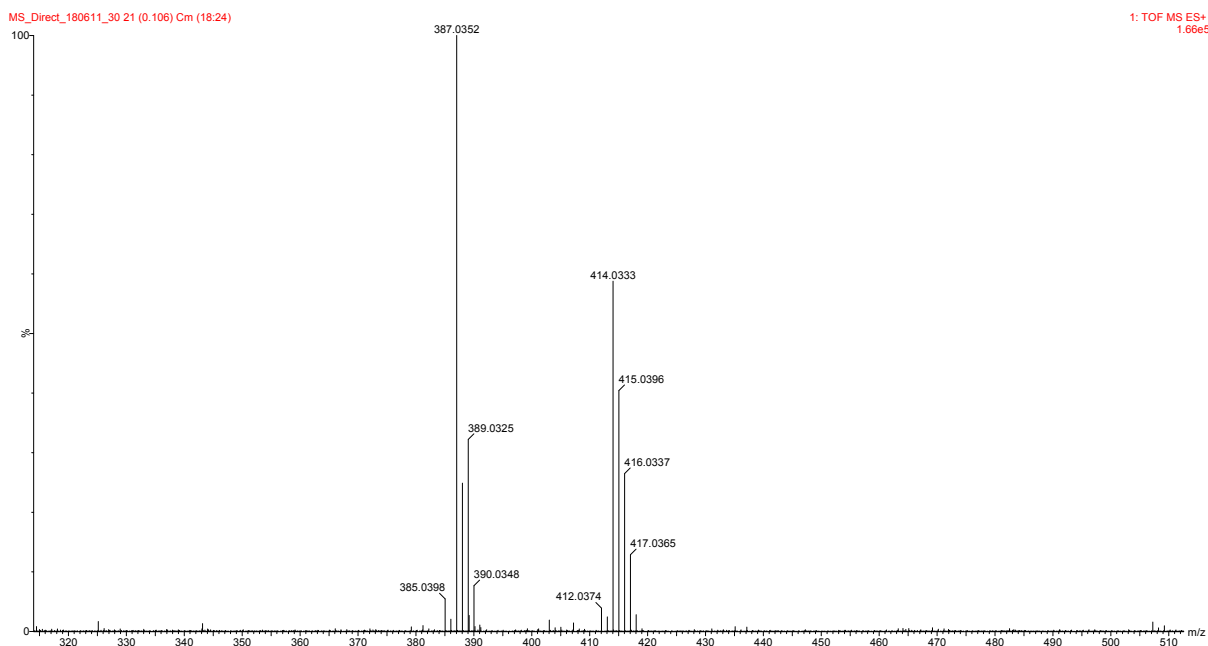

Figure S21: ESI-Mass Spectrum of **2g**.

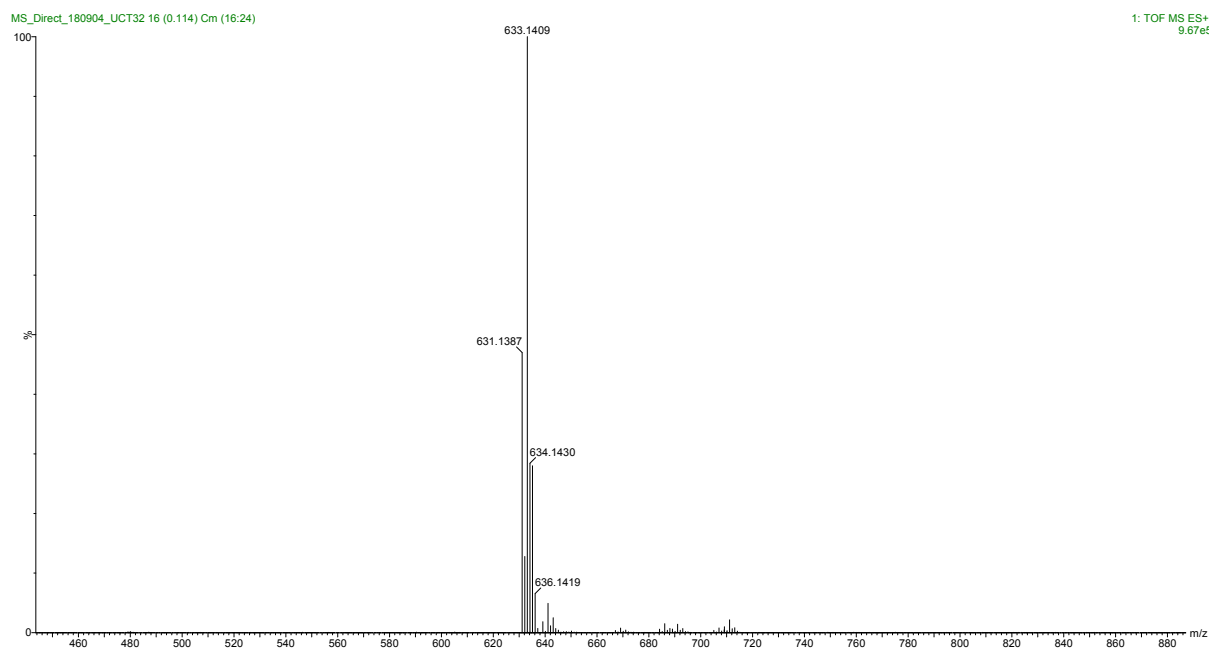

Figure S22: ESI-Mass Spectrum of **3a**.

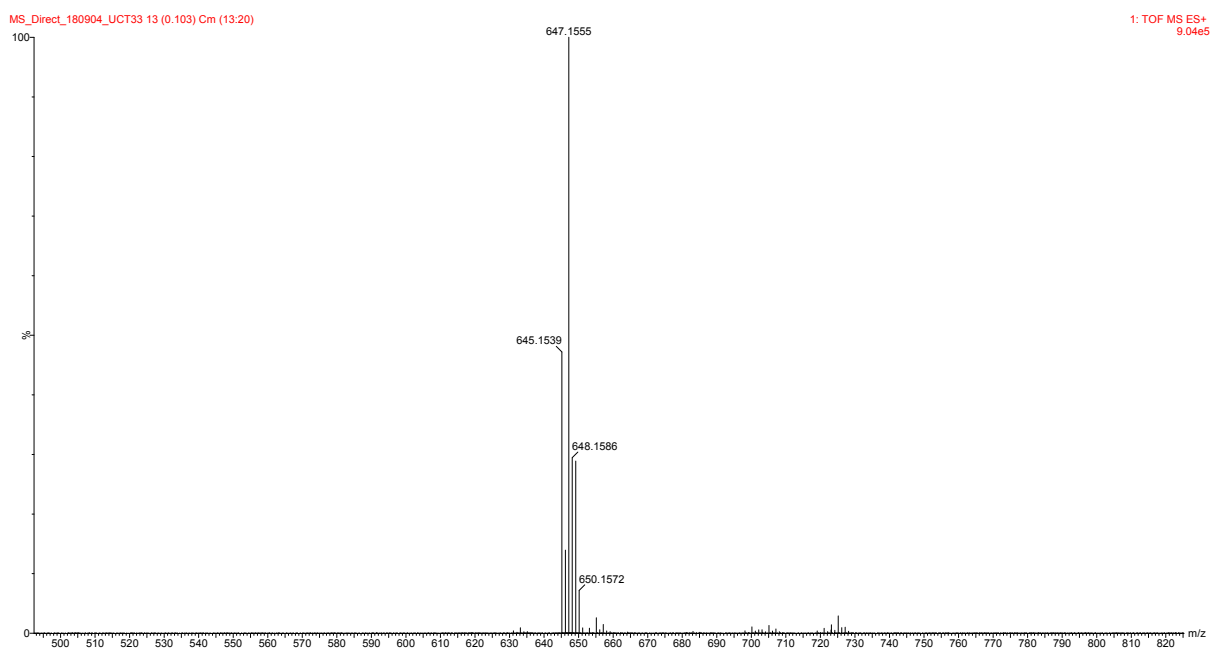

Figure S23: ESI-Mass Spectrum of 3b.

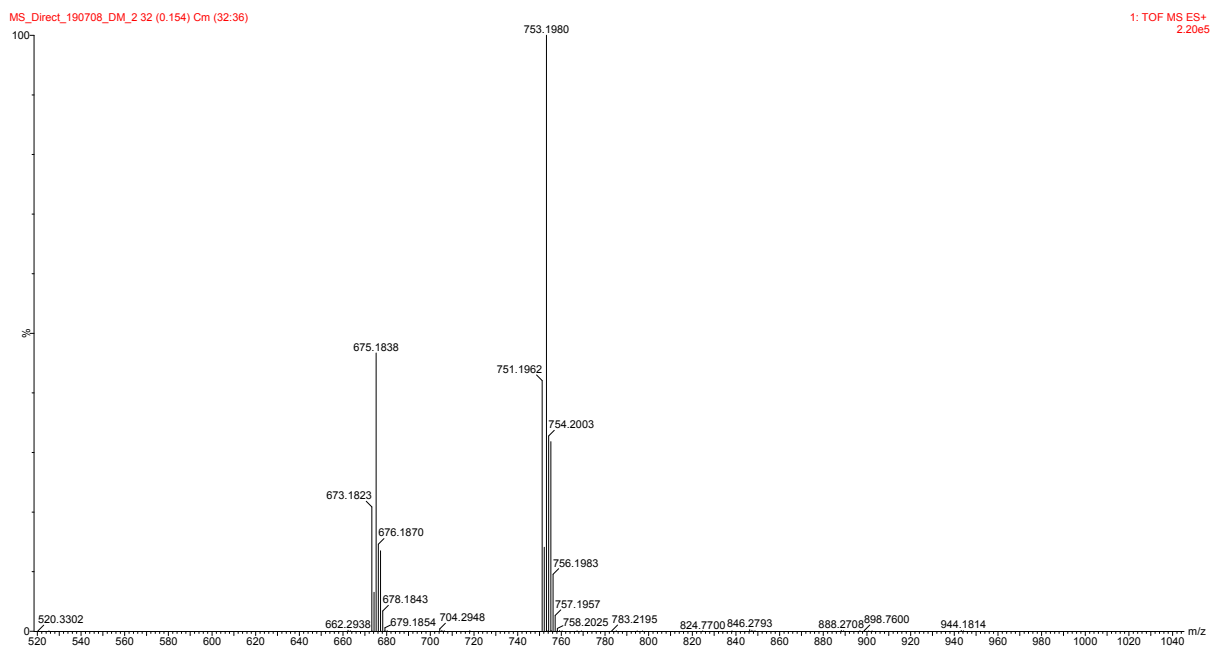

Figure S24: ESI-Mass Spectrum of 3c.





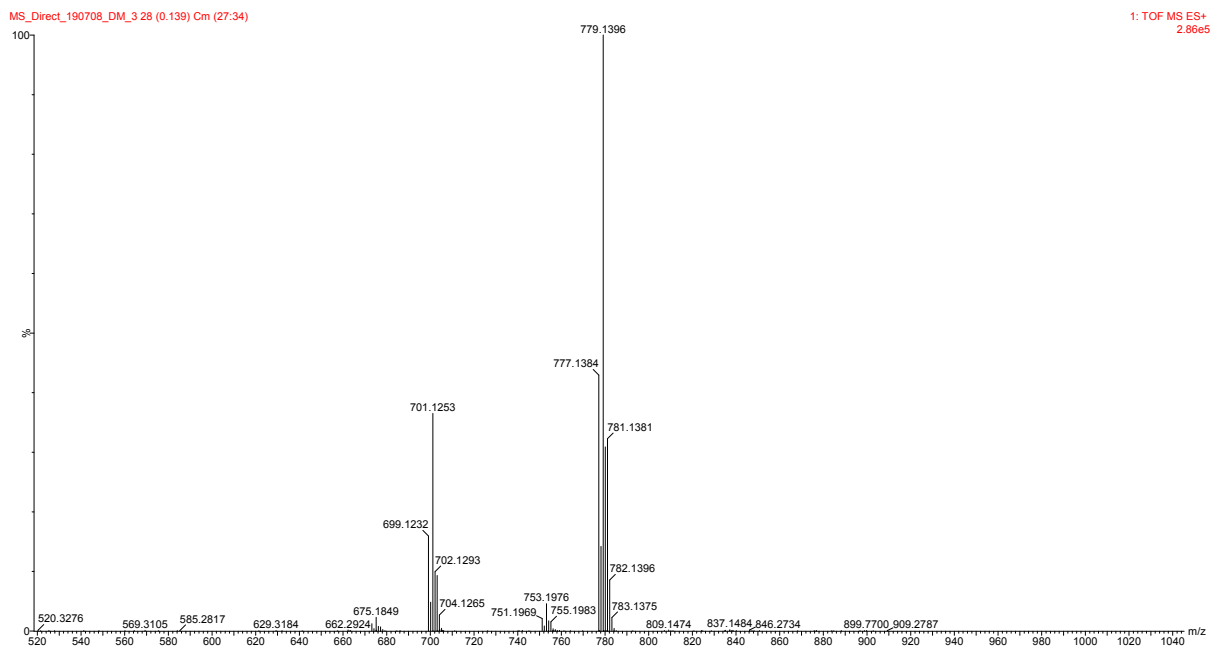

Figure S25: ESI-Mass Spectrum of 3d.

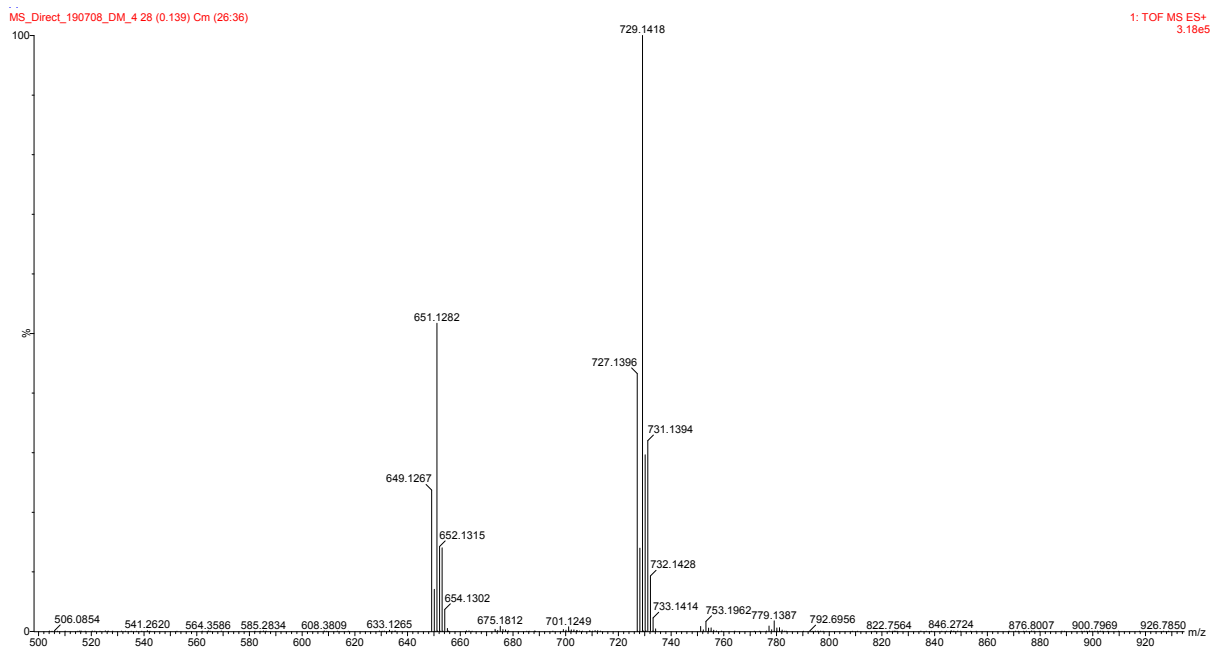

Figure S26: ESI-Mass Spectrum of 3e.

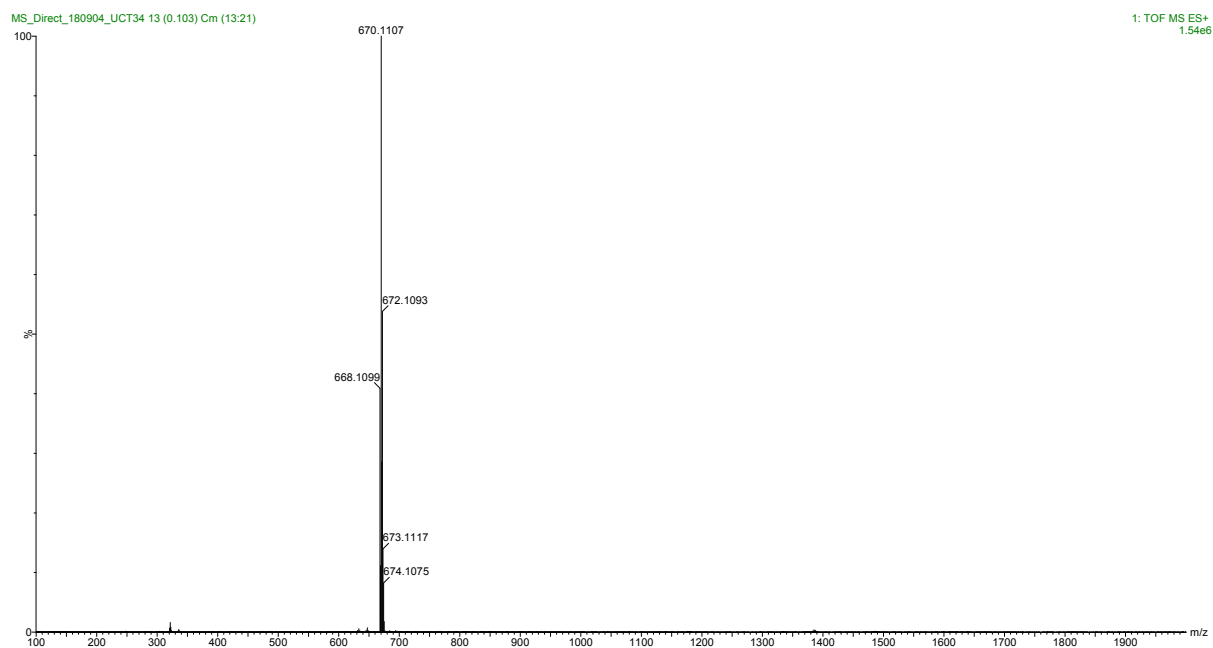

**Figure S27:** ESI-Mass Spectrum of **3f**.

**Table S1** Crystallographic data and refinement parameters for complexes **3a** and **4**.

|                                            | <b>Complex 3a</b>                                                | <b>Complex 4</b>                                                 |
|--------------------------------------------|------------------------------------------------------------------|------------------------------------------------------------------|
| <b>Chemical formula</b>                    | C <sub>27</sub> H <sub>25</sub> Cl <sub>2</sub> IrN <sub>4</sub> | C <sub>27</sub> H <sub>26</sub> Cl <sub>3</sub> IrN <sub>4</sub> |
| <b>Formula weight</b>                      | 668.63                                                           | 705.09                                                           |
| <b>Crystal system</b>                      | monoclinic                                                       | orthorhombic                                                     |
| <b>Space group</b>                         | P2 <sub>1</sub> /c (No. 14)                                      | Pbca (No. 61)                                                    |
| <b>a, b, c (Å)</b>                         | 12.6578(13), 7.9469(9), 24.600(3)                                | 7.9369(5), 22.7369(14), 28.4099(16)                              |
| <b>α, β, γ (°)</b>                         | 90, 97.192(3), 90                                                | -                                                                |
| <b>V (Å<sup>3</sup>)</b>                   | 2455.1(5)                                                        | 5126.9(5)                                                        |
| <b>Z</b>                                   | 4                                                                | 8                                                                |
| <b>D (g.cm<sup>-3</sup>)</b>               | 1.809                                                            | 1.827                                                            |
| <b>μ (mm<sup>-1</sup>)</b>                 | 5.680                                                            | 5.546                                                            |
| <b>F (000)</b>                             | 1304                                                             | 2752                                                             |
| <b>Crystal size (mm)</b>                   | 0.03 x 0.07 x 0.09                                               | 0.07 x 0.08 x 0.09                                               |
| <b>T (K)</b>                               | 173                                                              | 173                                                              |
| <b>Scan range (°)</b>                      | 1.7 < θ < 28.4                                                   | 1.4 < θ < 28.4                                                   |
| <b>Unique reflections</b>                  | 6162                                                             | 6441                                                             |
| <b>R<sub>int</sub></b>                     | 0.110                                                            | 0.121                                                            |
| <b>Reflections used<br/>[I &gt; 2σ(I)]</b> | 4783                                                             | 4775                                                             |
| <b>R indices (all data)</b>                | R 0.0314, wR2 0.0682, S 1.01                                     | R 0.0266, wR2 0.0546, S 1.01                                     |
| <b>Goodness-of-fit</b>                     | 1.01                                                             | 1.01                                                             |
| <b>Max, Min Δρ (e Å<sup>-3</sup>)</b>      | -1.14, 0.70                                                      | -0.63, 0.51                                                      |

**Table S2** Selected bond lengths and angles for iridium(III) complexes **3a** and **4**.

| <b>Complex 3a</b>                                               |            | <b>Complex 4</b>                                                  |            |
|-----------------------------------------------------------------|------------|-------------------------------------------------------------------|------------|
| <b>Bond lengths (Å)</b>                                         |            |                                                                   |            |
| Ir <sub>1</sub> -N <sub>1</sub>                                 | 2.071(3)   | Ir <sub>1</sub> -N <sub>1</sub>                                   | 2.159(3)   |
| Ir <sub>1</sub> -Cl <sub>1</sub>                                | 2.3986(12) | Ir <sub>1</sub> -Cl <sub>1</sub>                                  | 2.4167(12) |
| Ir <sub>1</sub> -C <sub>1</sub>                                 | 2.062(4)   | Ir <sub>1</sub> -Cl <sub>2</sub>                                  | 2.3952(9)  |
| <b>Bond angles (°)</b>                                          |            |                                                                   |            |
| Cl <sub>1</sub> -Ir <sub>1</sub> -N <sub>1</sub>                | 88.39(9)   | Cl <sub>1</sub> -Ir <sub>1</sub> -N <sub>1</sub>                  | 87.76(8)   |
| N <sub>1</sub> -Ir <sub>1</sub> -C <sub>1</sub>                 | 77.58(14)  | Cl <sub>2</sub> -Ir <sub>1</sub> -N <sub>1</sub>                  | 87.29(9)   |
| Cl <sub>1</sub> -Ir <sub>1</sub> -C <sub>1</sub>                | 85.84(11)  | Cl <sub>1</sub> -Ir <sub>1</sub> -Cl <sub>2</sub>                 | 85.34(3)   |
| <b>Torsion angles (°)</b>                                       |            |                                                                   |            |
| N <sub>1</sub> -C <sub>7</sub> -C <sub>6</sub> -C <sub>1</sub>  | 4.6(5)     | N <sub>4</sub> -C <sub>11</sub> -C <sub>12</sub> -C <sub>13</sub> | 47.8(5)    |
| C <sub>17</sub> -C <sub>9</sub> -N <sub>3</sub> -N <sub>2</sub> | -32.2(5)   | N <sub>4</sub> -N <sub>2</sub> -C <sub>5</sub> -C <sub>9</sub>    | 22.8(6)    |

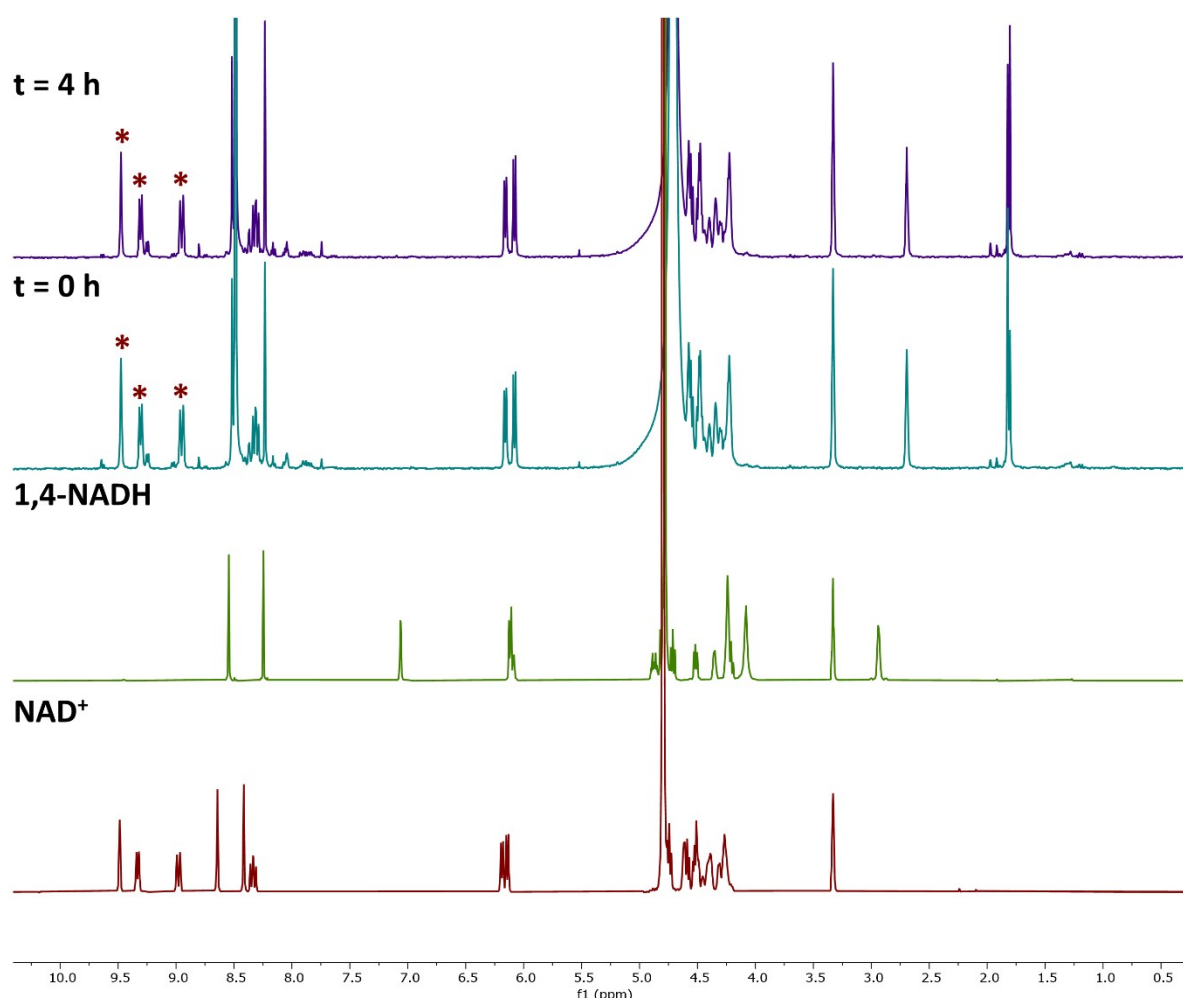

**Fig. S28:**  $^1\text{H}$  NMR spectra of a mixture of cationic Ir(III) complex **3f**,  $\text{NAD}^+$  and sodium formate in  $\text{MeOD}/\text{D}_2\text{O}$  at  $37^\circ\text{C}$ , showing no reduction to 1,4-NADH after 4 hours. Signals marked by (\*) represent  $\text{NAD}^+$ .

## Computational analysis

We hypothesized that the formation of the cyclometallated complexes **3a-e** proceeds via initial coordination of a triazole nitrogen to the iridium ion, followed by oxidative addition of a C-H bond and reductive elimination of HCl (or HOAc, as sodium acetate was used in the reaction). We decided to probe this hypothesis via computational simulations and to probe kinetic (monodentate quinoline coordination) versus thermodynamic (cyclometallated) control taking place during the synthesis of iridium(III) complexes **3a-e**. Two computational methods were used, namely, optimisation to find a stationary point and a relaxed geometry scan to scan the Ir-N bond length. The ORCA software (v 4.1.1)<sup>41</sup> was used and dispersion-corrected DFT was chosen as the level of theory,<sup>42</sup> specifically the BLYP-D3 method with def2-SVP as a basis and def2-ECP as an effective core potential. Optimisations were carried out; frequencies and molecular orbitals were calculated, and scans were carried out with the same level of theory. The labelled pathway for these studies is shown in Figure 2, detailing the reaction process from the iridium metal dimer, **I**, through plausible intermediates and ending with the characterised compounds, **IV** and **V**. Firstly, an optimisation of the cations of **IIIa** and **IIIb**, the plausible intermediates on the way to the final compounds, was carried out. The results of this study found that intermediate **IIIb**, with the iridium coordinated to the triazole nitrogen, is lower in energy than the quinoline-coordinated-Ir intermediate **IIIa** by 2 kcal/mol. While a small change, this shows that intermediate **IIIb** is already more stable than intermediate **IIIa**.

The reaction to form product **IV** or **V** from intermediate **II** and the ligand, **L**, was then investigated. The energy barrier between the reactants and the products is estimated by creating a cationic complex of **II** with the ligand, as shown in Fig. 2. A scan is carried out where the Ir-N bond is then pulled from a short bond length to several Ångströms away. This process, although modelled as the inverse of the ligand binding, represents how the ligand binds to **II**, by the principle of microscopic reversibility. A small energy barrier would be considered to lead to a kinetic product, while a larger energy barrier which leads to a lower energy product would be considered the thermodynamic route. Fig. 3 shows the outcome of the two simulations performed, one with the ligand bound to the metal at the quinoline nitrogen and one with the ligand binding at the triazole nitrogen. Fig. 3a shows the energy diagram for the former, illustrating that the outcome for the coordination of the metal to the quinoline nitrogen is a small energy barrier. When the distance between the Ir and quinoline nitrogen is 6.0 Å, the resulting complex structure is relatively low in energy. As the distance thereafter decreases, the energy increases until it eventually reaches an energy barrier of approximately 5 kcal/mol. At this energy, the bond forms, resulting in a higher energy complex. This energy barrier can be overcome at standard state temperature in both the forward and reverse reaction, which explains why the monodentate complex **4** is formed relatively rapidly at room temperature and suggests a kinetic product. The outcome for the latter, the coordination of the metal to the triazole nitrogen, is shown in the energy diagram in Fig. 3b. In this case, the energy barrier for the formation of the Ir-N bond is very high, with no minimum observed thus far. When the distance between the Ir and triazole nitrogen is 5.2 Å, the resulting complex structure is low in energy, however, as the distance decreases, the energy increases until it eventually reaches an energy barrier of nearly 12 kcal/mol. The higher predicted energy required to form the cyclometallated complex **3a** explains the need for the high temperature to synthesise this product. These calculations support the hypothesis that the complex **3a** is a thermodynamic product while complex **4** is a kinetic product.

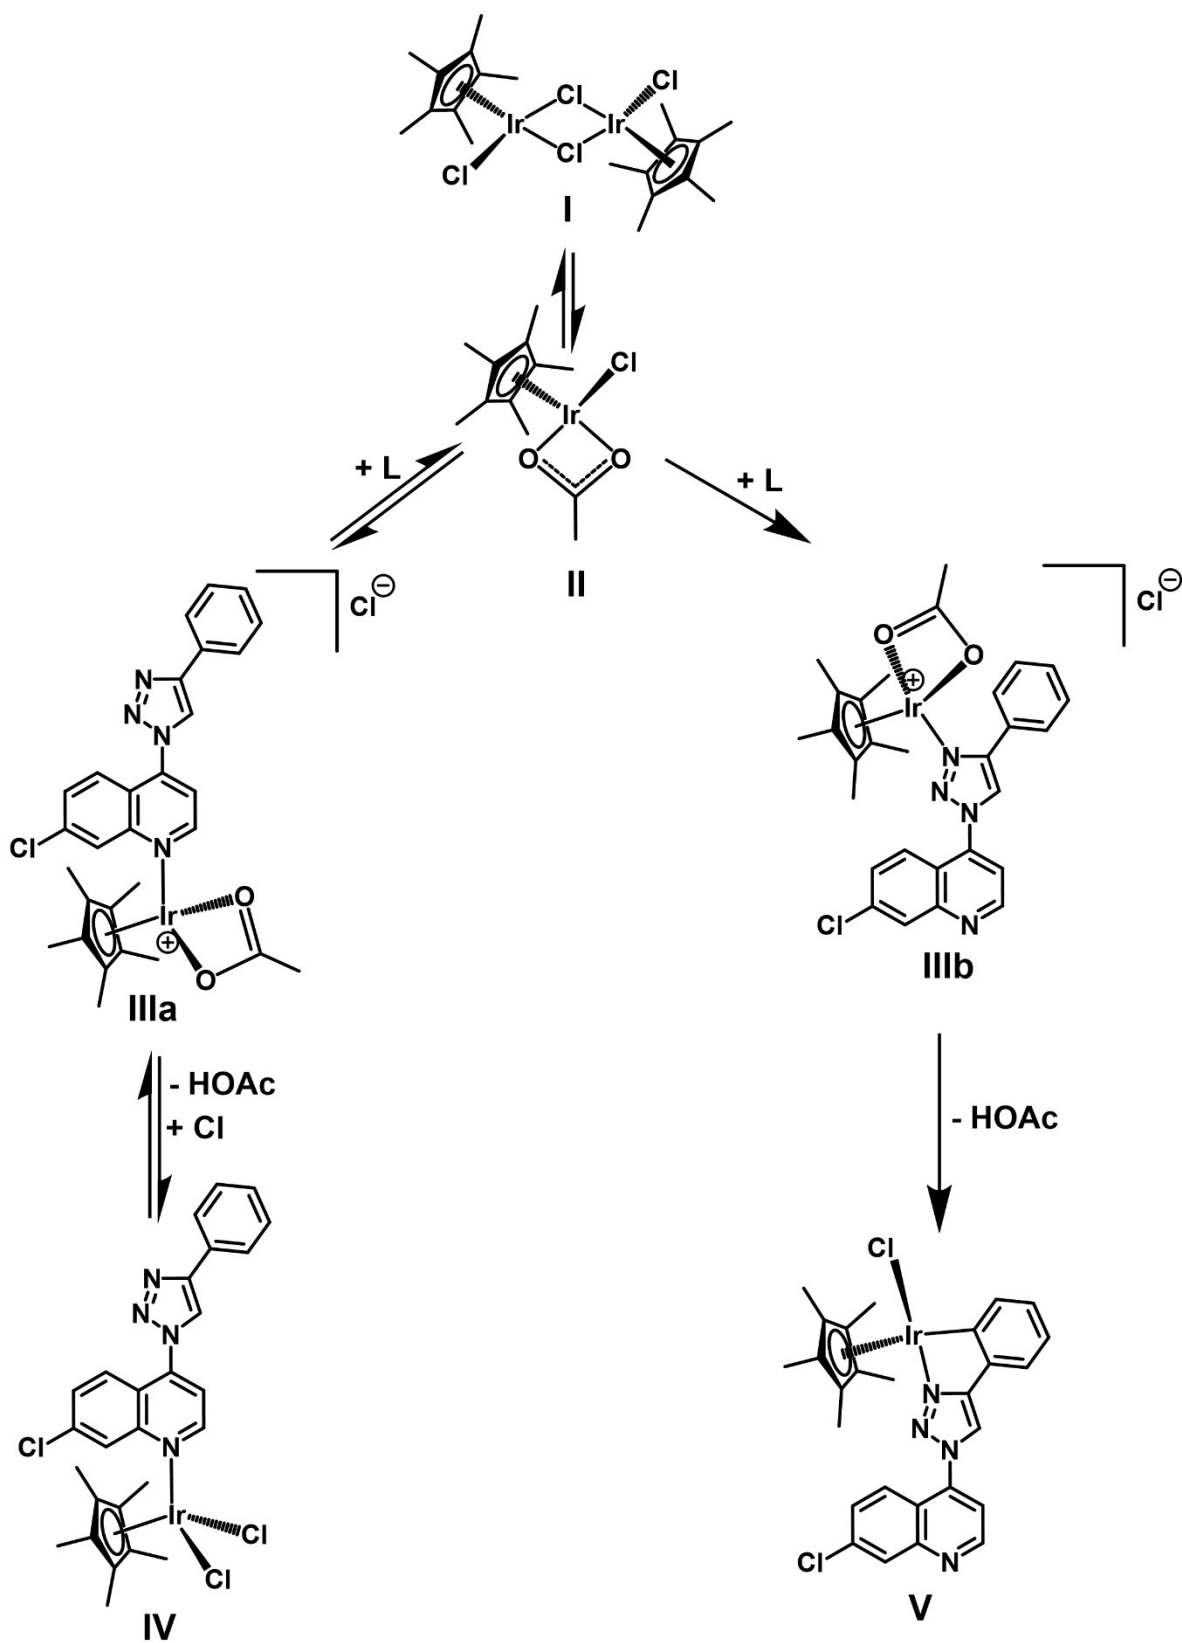

Fig. S29 Labelled pathway for the reaction process from the Ir Cp\* dimer to the final complexes.

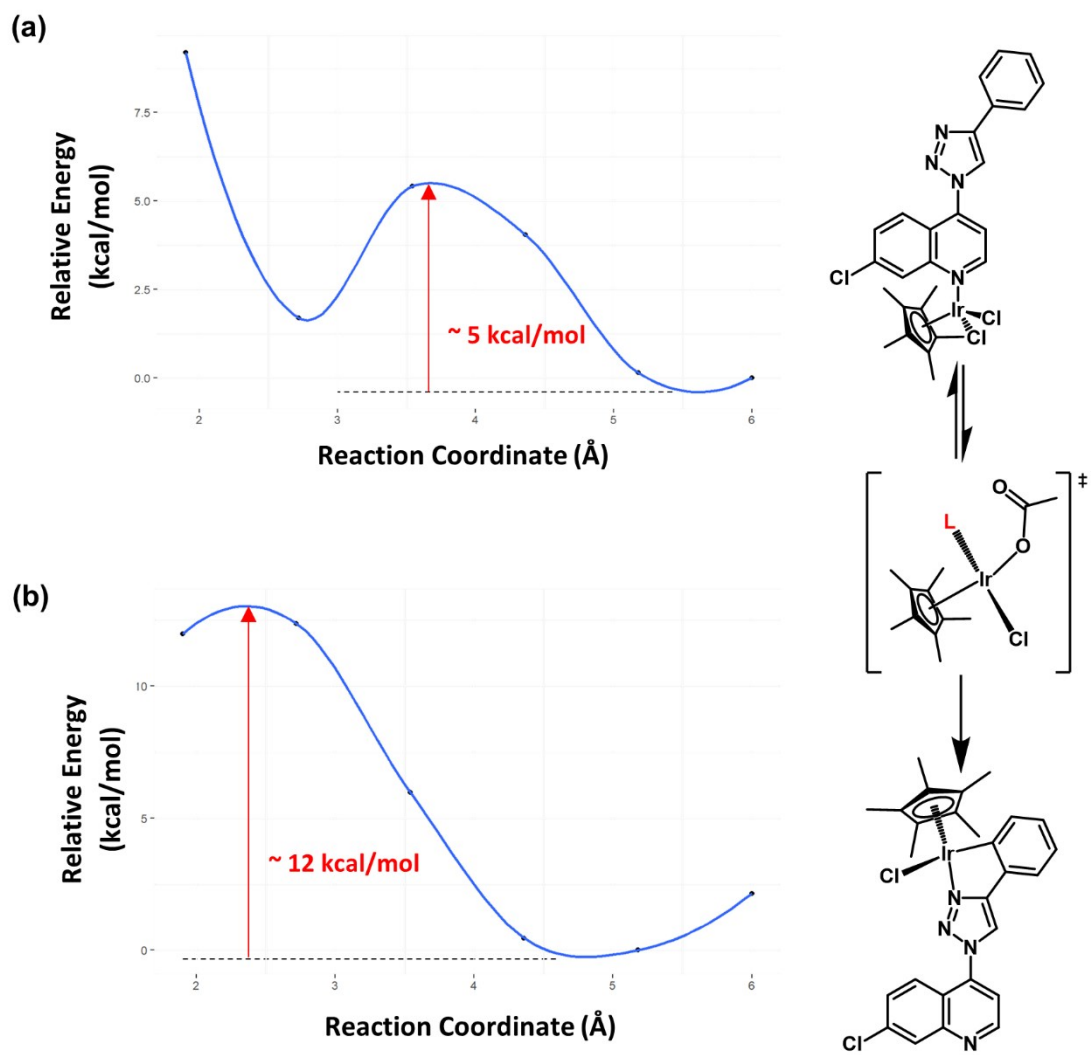

**Fig. S30** Reverse energy diagrams of the two outcomes of metal coordination to the ligand at either (a) the quinoline nitrogen or (b) the triazole nitrogen.
